# Supplementary material for: Metalloligand-based coordination polymer embedding the nitrosyl ruthenium complex for photoactive materials with bound nitric oxide
Source: Royal Society of Chemistry journal article supplement (doi:10.1039/d1dt03943a), 2022-01-01
Supplement: d1dt03943a1.pdf [file d1dt03943a1.pdf]

Supporting Information  
for the  
Article entitled

Metalloligand-based Coordination Polymer Embedding the Nitrosyl  
Ruthenium Complex for Photoactive Materials with Bounded Nitric Oxide

authored by

Vasily Vorobyev,\* Anastasia M. Cheplakova, Elena D. Stolyarova,  
Vladislav Yu. Komarov and Gennadiy A. Kostin

Nikolaev Institute of Inorganic Chemistry, Siberian Branch of the Russian  
Academy of Science, Novosibirsk 630090, Russia

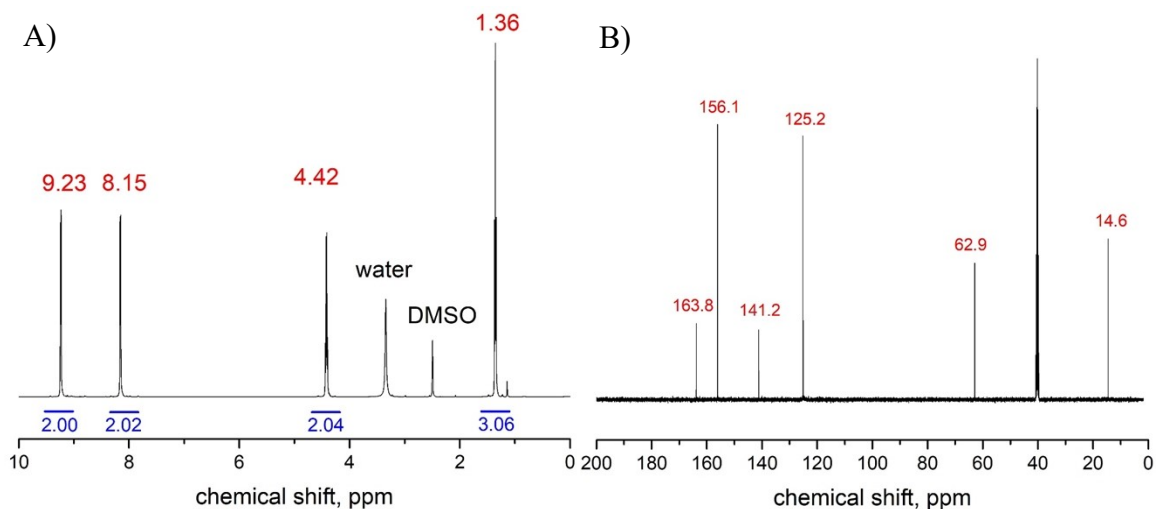

**Figure S1.** a) <sup>1</sup>H-NMR and b) <sup>13</sup>C-NMR spectra of insoluble product after reaction between [RuNO(inicEt)<sub>2</sub>Cl<sub>3</sub>] with HNO<sub>3</sub> dissolved in DMSO.

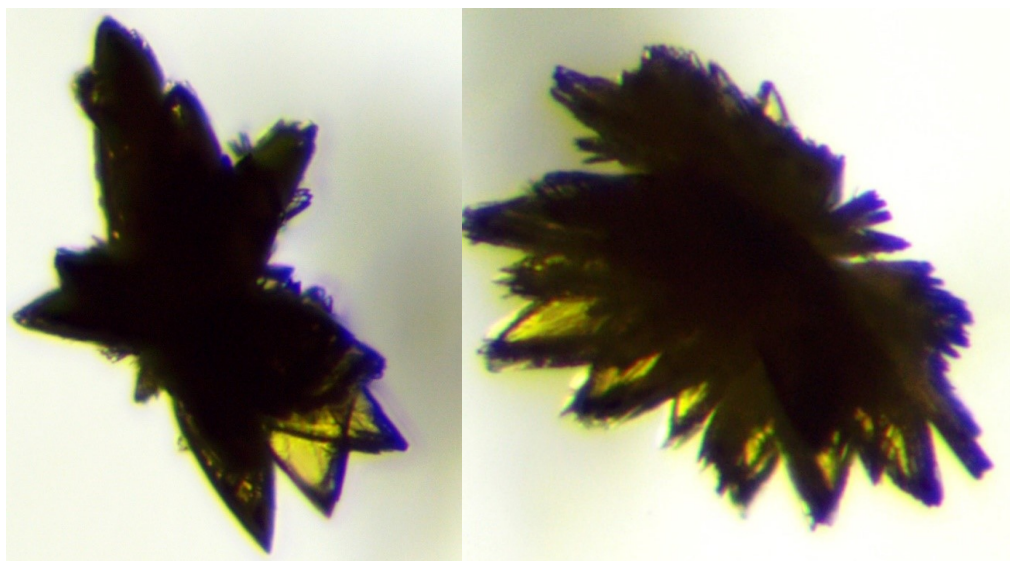

**Figure S2.** The typical view of the crystal aggregates for [RuNO(H<sub>2</sub>O)<sub>2</sub>(inic)<sub>2</sub>(OH)]\*xH<sub>2</sub>O. The largest aggregate size in both cases is equal 0.25 mm.

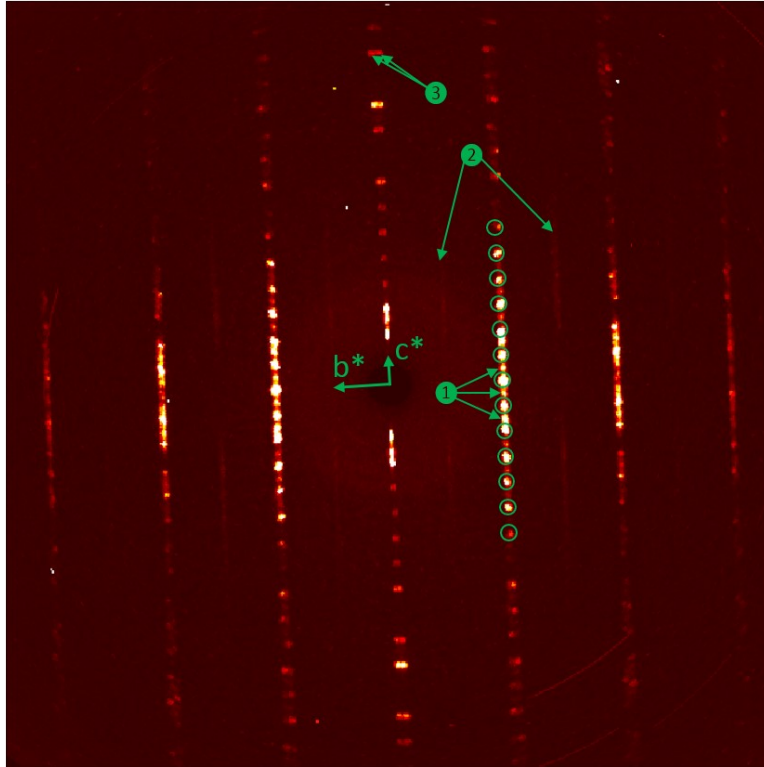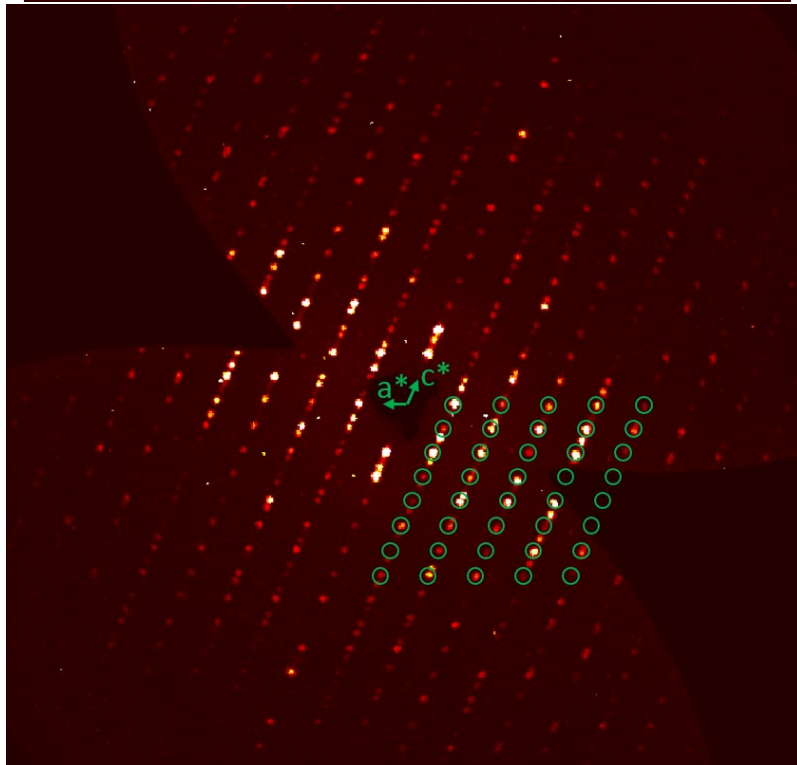

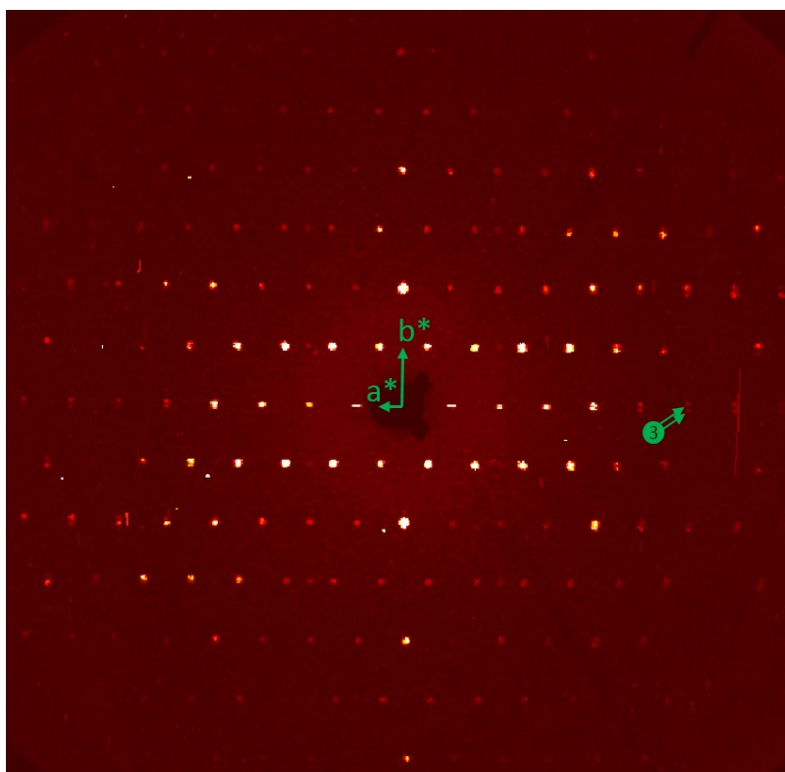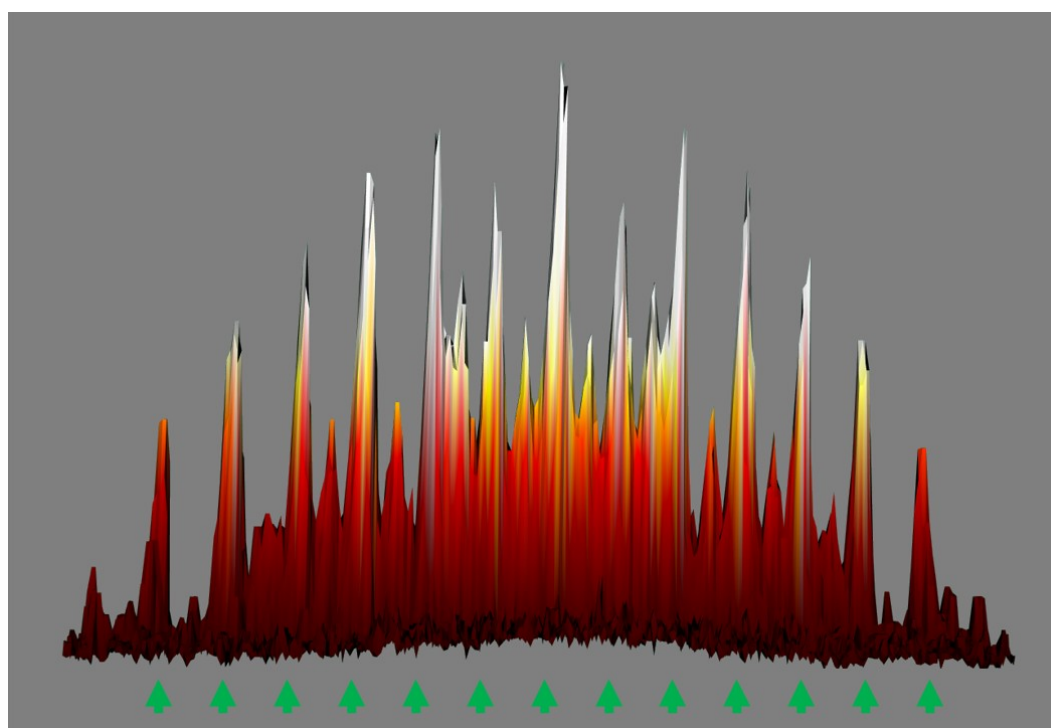

**Figure S3.** Flat ( $0kl$ ,  $h0l$ ,  $hk0$ ) and linear ( $02l$ ) reconstructions of the intensity distribution in reciprocal space. The open circles mark the positions of the selected reflections of the monoclinic  $C$  lattice. ① - sharp peaks outside the lattice; ② - diffuse

intensity; ③ - splitting of high-angle peaks. The intensity distribution on the  $02l$  reconstruction (logarithmic intensity scale) has a complex character.

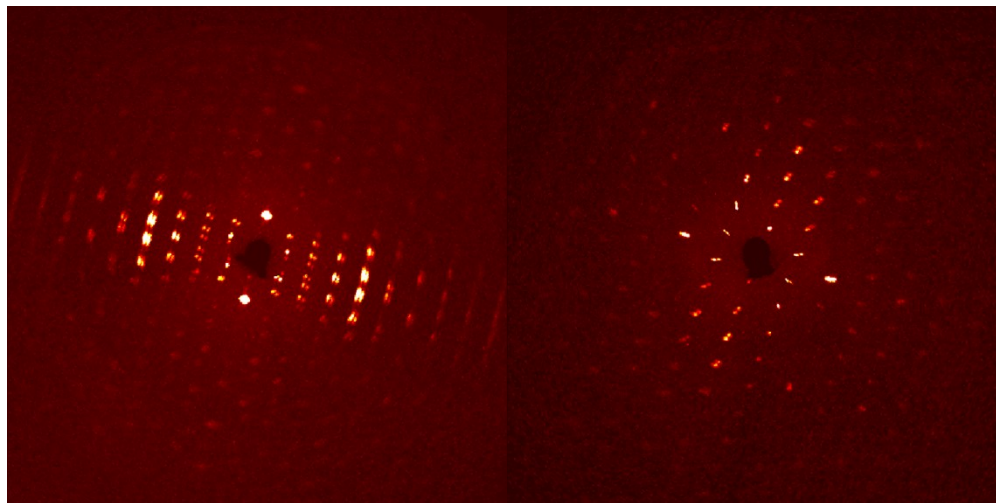

**Figure S4.** Reconstructions of the diffraction intensity distribution from a crystal aged under the mother liquor drawn through planes equivalent to  $h0l$  and  $hk0$  of a freshly fallen crystal (compare with Fig. S3). The diffraction was collected at 170 K.

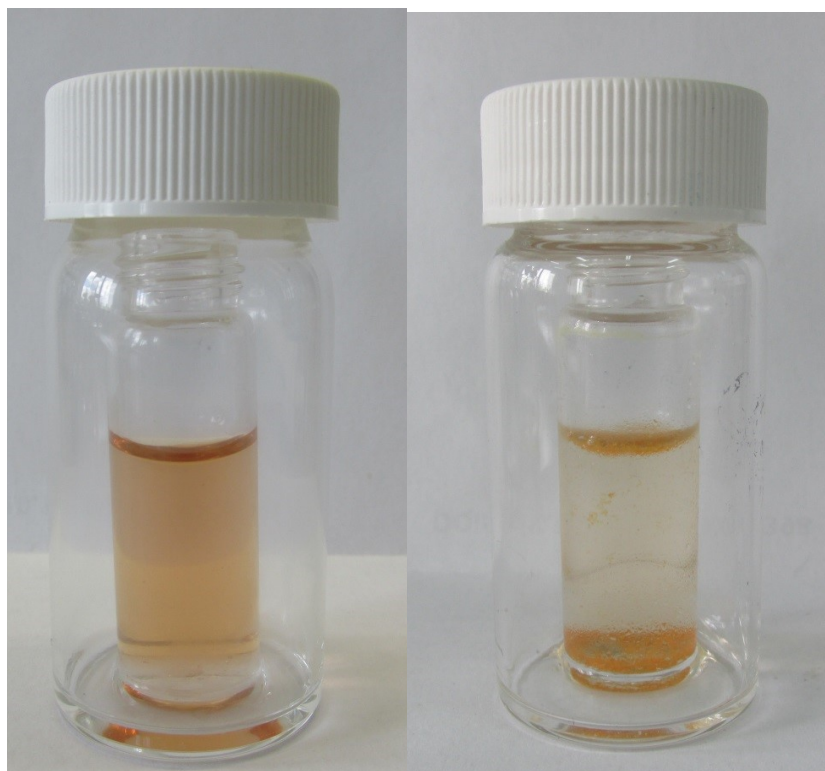

**Figure S5.** The vial with alkaline solution of  $[\text{RuNO}(\text{inicEt})_2\text{Cl}_3]$  and  $\text{Zn}(\text{CH}_3\text{COO})_2$  before (left) and after (right) saturation with acetic acid.

**Table S1. Crystal data and geometry parameters for [Zn{RuNO(H<sub>2</sub>O)(inic)<sub>2</sub>(OH)<sub>2</sub>}<sub>2</sub>] $\cdot$ 12H<sub>2</sub>O**

Crystal data and structure refinement for complex.

|                                             |                                                                                                             |
|---------------------------------------------|-------------------------------------------------------------------------------------------------------------|
| Identification code                         | [Zn{RuNO(H <sub>2</sub> O)(inic) <sub>2</sub> (OH) <sub>2</sub> } <sub>2</sub> ] $\cdot$ 12H <sub>2</sub> O |
| Empirical formula                           | C <sub>24</sub> H <sub>40</sub> N <sub>6</sub> O <sub>28</sub> Ru <sub>2</sub> Zn                           |
| Formula weight                              | 1128.13                                                                                                     |
| Temperature/K                               | 150(2)                                                                                                      |
| Crystal system                              | triclinic                                                                                                   |
| Space group                                 | P-1                                                                                                         |
| a/Å                                         | 9.0341(19)                                                                                                  |
| b/Å                                         | 9.664(2)                                                                                                    |
| c/Å                                         | 12.968(3)                                                                                                   |
| $\alpha$ /°                                 | 71.157(7)                                                                                                   |
| $\beta$ /°                                  | 72.824(6)                                                                                                   |
| $\gamma$ /°                                 | 73.170(7)                                                                                                   |
| Volume/Å <sup>3</sup>                       | 999.9(4)                                                                                                    |
| Z                                           | 1                                                                                                           |
| $\rho_{\text{calc}}$ /cm <sup>3</sup>       | 1.874                                                                                                       |
| $\mu$ /mm <sup>-1</sup>                     | 1.447                                                                                                       |
| F(000)                                      | 568.0                                                                                                       |
| Crystal size/mm <sup>3</sup>                | 0.538 $\times$ 0.515 $\times$ 0.278                                                                         |
| Radiation                                   | MoK $\alpha$ ( $\lambda$ = 0.71073)                                                                         |
| 2 $\Theta$ range for data collection/°      | 3.404 to 57.9                                                                                               |
| Index ranges                                | -12 $\leq$ h $\leq$ 12, -13 $\leq$ k $\leq$ 8, -17 $\leq$ l $\leq$ 17                                       |
| Reflections collected                       | 15540                                                                                                       |
| Independent reflections                     | 5208 [R <sub>int</sub> = 0.0781, R <sub>sigma</sub> = 0.0978]                                               |
| Data/restraints/parameters                  | 5208/0/277                                                                                                  |
| Goodness-of-fit on F <sup>2</sup>           | 1.029                                                                                                       |
| Final R indexes [I $\geq$ 2 $\sigma$ (I)]   | R <sub>1</sub> = 0.0630, wR <sub>2</sub> = 0.1528                                                           |
| Final R indexes [all data]                  | R <sub>1</sub> = 0.0874, wR <sub>2</sub> = 0.1658                                                           |
| Largest diff. peak/hole / e Å <sup>-3</sup> | 3.36/-2.25                                                                                                  |

Bond Lengths

| Atom | Atom | Length/Å | Atom | Atom | Length/Å |
|------|------|----------|------|------|----------|
| Ru1  | O2   | 2.018(4) | O12  | C16  | 1.265(7) |
| Ru1  | O1   | 1.946(4) | N2   | C21  | 1.346(7) |
| Ru1  | O4   | 2.109(4) | N2   | C25  | 1.354(7) |
| Ru1  | N2   | 2.103(5) | N1   | C11  | 1.355(7) |

## Bond Lengths

| Atom | Atom             | Length/Å | Atom | Atom | Length/Å |
|------|------------------|----------|------|------|----------|
| Ru1  | N1               | 2.065(5) | N1   | C15  | 1.347(7) |
| Ru1  | N3               | 1.759(5) | O3   | N3   | 1.132(6) |
| Zn1  | O2 <sup>1</sup>  | 2.150(4) | C12  | C11  | 1.375(8) |
| Zn1  | O2               | 2.150(4) | C12  | C13  | 1.402(8) |
| Zn1  | O1 <sup>1</sup>  | 2.097(4) | C23  | C24  | 1.393(8) |
| Zn1  | O1               | 2.097(4) | C23  | C26  | 1.524(8) |
| Zn1  | O11 <sup>2</sup> | 2.122(4) | C23  | C22  | 1.388(8) |
| Zn1  | O11 <sup>3</sup> | 2.122(4) | C24  | C25  | 1.381(8) |
| O11  | Zn1 <sup>4</sup> | 2.122(4) | C21  | C22  | 1.381(8) |
| O11  | C16              | 1.253(7) | C14  | C15  | 1.386(8) |
| O22  | C26              | 1.251(7) | C14  | C13  | 1.380(8) |
| O21  | C26              | 1.254(7) | C13  | C16  | 1.510(8) |

<sup>1</sup>1-X,1-Y,2-Z; <sup>2</sup>1-X,-Y,2-Z; <sup>3</sup>+X,1+Y,+Z; <sup>4</sup>+X,-1+Y,+Z

## Bond Angles

| Atom            | Atom | Atom             | Angle/°    | Atom | Atom | Atom             | Angle/°    |
|-----------------|------|------------------|------------|------|------|------------------|------------|
| O2              | Ru1  | O4               | 169.40(15) | Ru1  | O2   | Zn1              | 99.20(15)  |
| O2              | Ru1  | N2               | 93.38(17)  | Ru1  | O1   | Zn1              | 103.42(17) |
| O2              | Ru1  | N1               | 85.79(18)  | C16  | O11  | Zn1 <sup>4</sup> | 124.0(4)   |
| O1              | Ru1  | O2               | 81.93(15)  | C21  | N2   | Ru1              | 121.2(4)   |
| O1              | Ru1  | O4               | 87.82(16)  | C21  | N2   | C25              | 118.3(5)   |
| O1              | Ru1  | N2               | 87.54(17)  | C25  | N2   | Ru1              | 120.5(4)   |
| O1              | Ru1  | N1               | 90.01(17)  | C11  | N1   | Ru1              | 123.4(4)   |
| N2              | Ru1  | O4               | 88.84(16)  | C15  | N1   | Ru1              | 118.6(4)   |
| N1              | Ru1  | O4               | 91.55(16)  | C15  | N1   | C11              | 118.0(5)   |
| N1              | Ru1  | N2               | 177.50(18) | O3   | N3   | Ru1              | 173.8(5)   |
| N3              | Ru1  | O2               | 97.78(18)  | C11  | C12  | C13              | 119.5(5)   |
| N3              | Ru1  | O1               | 178.4(2)   | C24  | C23  | C26              | 120.7(5)   |
| N3              | Ru1  | O4               | 92.39(18)  | C22  | C23  | C24              | 118.1(5)   |
| N3              | Ru1  | N2               | 94.0(2)    | C22  | C23  | C26              | 121.3(5)   |
| N3              | Ru1  | N1               | 88.4(2)    | C25  | C24  | C23              | 119.2(5)   |
| O2              | Zn1  | O2 <sup>1</sup>  | 180.0(2)   | N2   | C21  | C22              | 122.1(5)   |
| O1              | Zn1  | O2 <sup>1</sup>  | 104.54(14) | N1   | C11  | C12              | 122.3(5)   |
| O1              | Zn1  | O2               | 75.46(14)  | O22  | C26  | O21              | 125.5(6)   |
| O1 <sup>1</sup> | Zn1  | O2               | 104.54(14) | O22  | C26  | C23              | 117.0(5)   |
| O1 <sup>1</sup> | Zn1  | O2 <sup>1</sup>  | 75.46(14)  | O21  | C26  | C23              | 117.4(5)   |
| O1              | Zn1  | O1 <sup>1</sup>  | 180.0      | C21  | C22  | C23              | 119.9(5)   |
| O1 <sup>1</sup> | Zn1  | O11 <sup>2</sup> | 90.07(15)  | C13  | C14  | C15              | 119.7(5)   |
| O1              | Zn1  | O11 <sup>3</sup> | 90.07(15)  | N2   | C25  | C24              | 122.4(5)   |



### Bond Angles

| Atom             | Atom | Atom             | Angle/°   | Atom | Atom | Atom | Angle/°  |
|------------------|------|------------------|-----------|------|------|------|----------|
| O1 <sup>1</sup>  | Zn1  | O11 <sup>3</sup> | 89.93(15) | N1   | C15  | C14  | 122.4(5) |
| O1               | Zn1  | O11 <sup>2</sup> | 89.93(15) | C12  | C13  | C16  | 121.6(5) |
| O11 <sup>2</sup> | Zn1  | O2 <sup>1</sup>  | 90.54(16) | C14  | C13  | C12  | 118.0(5) |
| O11 <sup>3</sup> | Zn1  | O2               | 90.54(16) | C14  | C13  | C16  | 120.5(5) |
| O11 <sup>2</sup> | Zn1  | O2               | 89.46(16) | O11  | C16  | O12  | 126.8(5) |
| O11 <sup>3</sup> | Zn1  | O2 <sup>1</sup>  | 89.46(16) | O11  | C16  | C13  | 116.7(5) |
| O11 <sup>2</sup> | Zn1  | O11 <sup>3</sup> | 180.0     | O12  | C16  | C13  | 116.4(5) |

<sup>1</sup>1-X,1-Y,2-Z; <sup>2</sup>1-X,-Y,2-Z; <sup>3</sup>+X,1+Y,+Z; <sup>4</sup>+X,-1+Y,+Z

### TGA studies of [Zn{RuNO(H<sub>2</sub>O)(inic)<sub>2</sub>(OH)<sub>2</sub>}<sub>2</sub>]<sub>2</sub>·12H<sub>2</sub>O

At least three overlapped stages can be detected on TG(DTG) and DTA curves for Zn-Ru complex (Fig. S3).

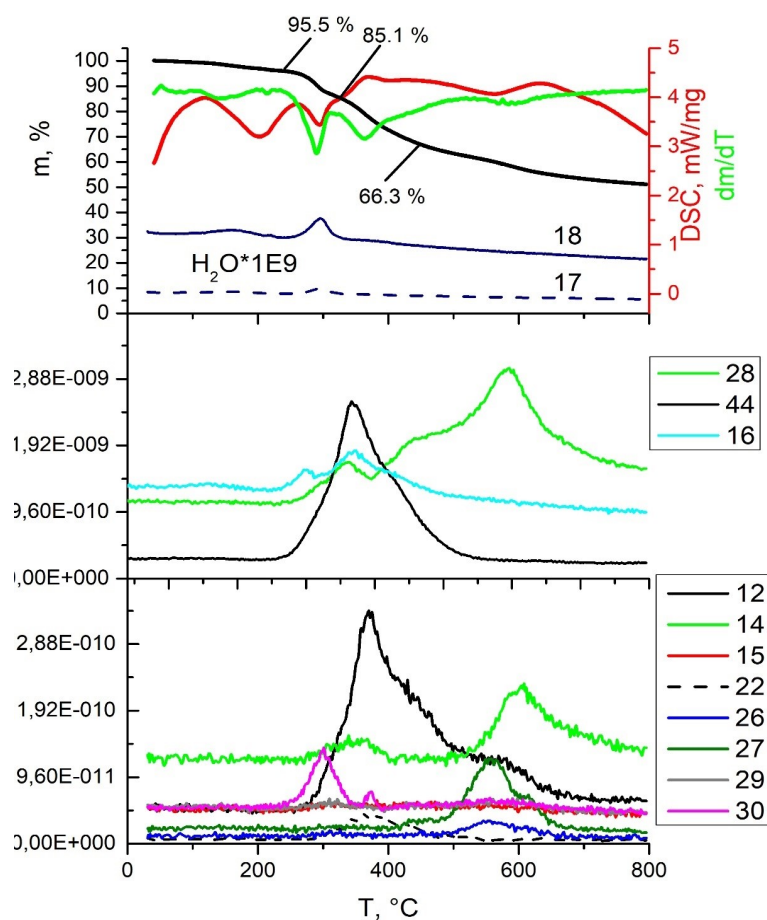

**Figure S6.** Synchronous TG – MS data for [Zn{RuNO(H<sub>2</sub>O)(inic)<sub>2</sub>(OH)<sub>2</sub>}<sub>2</sub>]<sub>2</sub>·12H<sub>2</sub>O in Ar atmosphere with 10K/min heating rate.



Guest water molecules are gradually released upon heating of the sample up to 200-250°C. The mass loss at 250°C (4.5 %) approximately corresponds to 4-5 H<sub>2</sub>O molecules. The main water release takes place at the temperatures 250-320°C and associated with sharp increase of the ion current with m/z ratio of 18. At 320°C the mass loss (15 %, 9-10 H<sub>2</sub>O molecules) well corresponds to the elemental analysis for the fresh crystals and the water content derived from single crystal XRD studies. The destruction of Ru-NO fragment also begins at that stage (ion current m/z = 30).

The next stage 320-450°C is associated with de-carboxylation of isonicotinic acid residues (ion current m/z = 44) and also with the release of coordinated hydroxide and water ligands. The mass loss after 450°C is equal 34 %. And the final decomposition of pyridine rings in inert atmosphere slowly goes after 450°C.

The similar picture is observed in reductive atmosphere (Fig. S4), except of NO formation. In the reductive atmosphere nitric oxide is transformed to nitrogen (ion current m/z = 28).

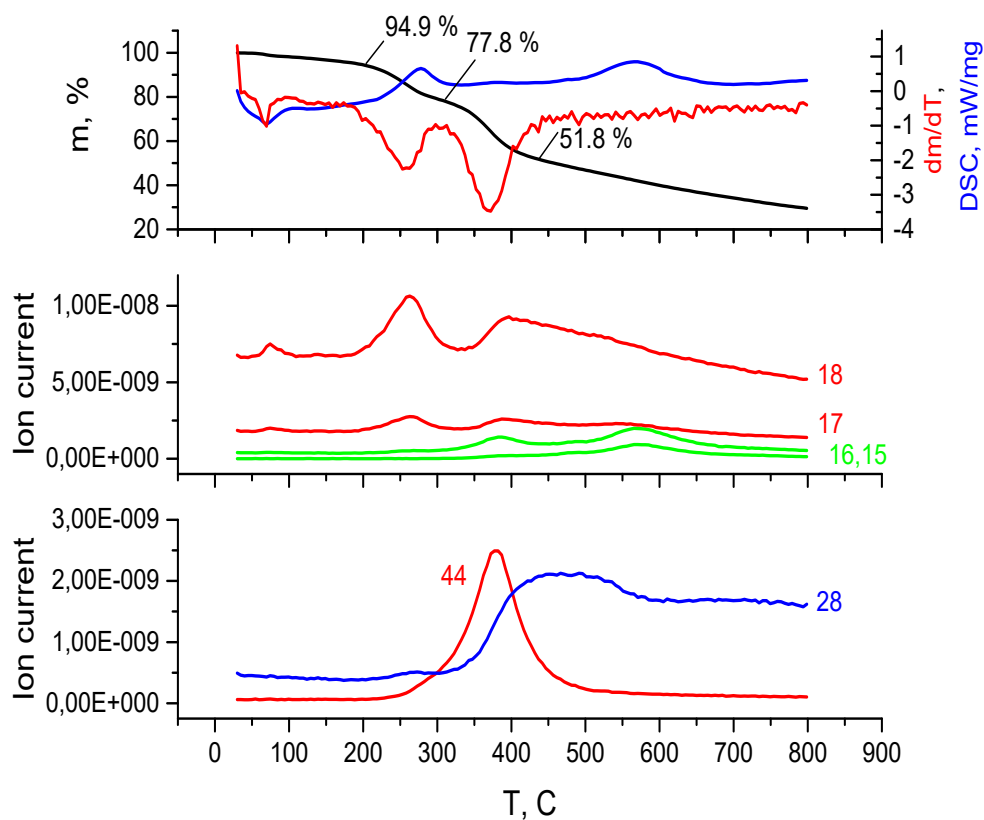

**Figure S7.** Synchronous TG – MS data for  $[\text{Zn}\{\text{RuNO}(\text{H}_2\text{O})(\text{inic})_2(\text{OH})_2\}_2] \cdot 12\text{H}_2\text{O}$  in Ar/H<sub>2</sub> atmosphere with 10K/min heating rate.

The TG (DTG) and DSC curves for  $[\text{RuNO}(\text{H}_2\text{O})_2(\text{inic})_2(\text{OH})] \cdot x\text{H}_2\text{O}$  clearly demonstrate three separated stages of decomposition: 150-230°C, 270-390°C and 430-500°C (Fig. S5). The first and second stages are slightly endothermic and the last stage is exothermic.

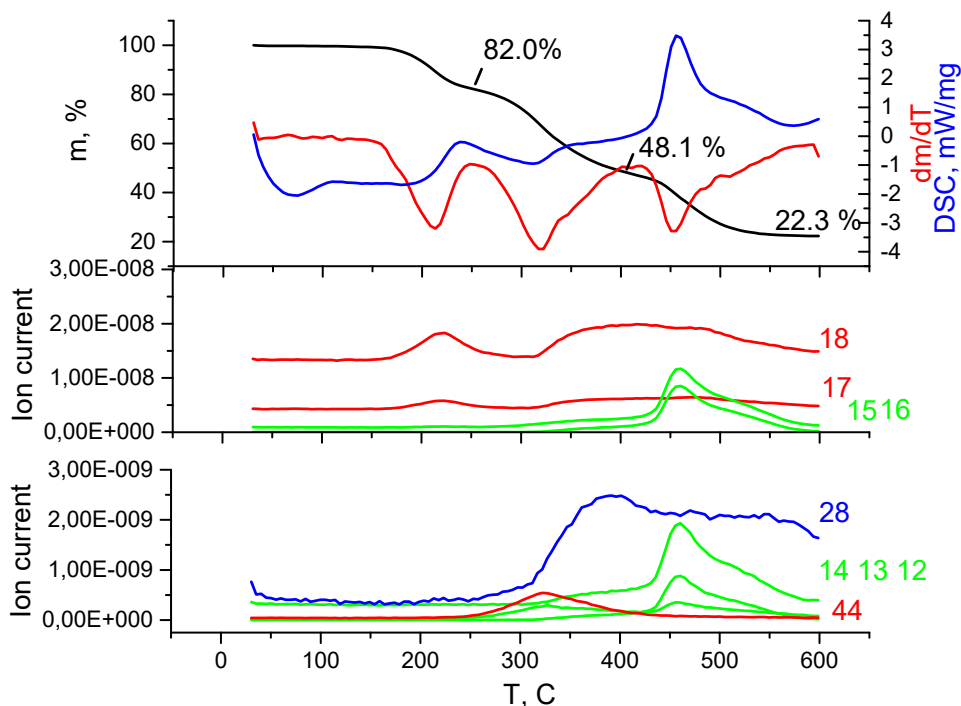

**Figure S8.** Synchronous TG – MS data for  $[\text{RuNO}(\text{H}_2\text{O})_2(\text{inic})_2(\text{OH})]\cdot x\text{H}_2\text{O}$  in  $\text{Ar}/\text{H}_2$  atmosphere with 10 K/min heating rate.

According to mass changes and mass-spectra of gaseous phase the stages can be attributed to the following processes:

1. Complete removal of all water molecules and hydroxo-ligands. The only visible ion currents at that stage ( $m/z = 17$  and  $18$ ) correspond to water molecules. Mass change at that stage (near 18 %) corresponds to 77-83 Da, depending on the initial formula, which is equal to 4-4.5  $\text{H}_2\text{O}$  molecules.
2. The second stage is mainly accompanied by ion currents corresponding to  $\text{CO}_2$  ( $m/z = 44$ ), nitrogen ( $m/z = 28$ ) and water ( $m/z = 17, 18$ ). Thus the decarboxylation of isonicotinic acid fragments and reduction of NO group should be taken into consideration. However, the mass change (50-52 %) is larger than supposed for removal of  $\text{H}_2\text{O}_x + \text{NO} + 2\text{CO}_2$ ; thus, the beginning of pyridine rings decomposition should be considered.

3. The mass-spectra show the set of ion currents ( $m/z = 12-16$ ) that is typical for decomposition of hydrocarbons in  $H_2$  atmosphere. Thus the last stage corresponds to the removal of the pyridine residuals.

Final residue after heating up to  $600^\circ C$  was analyzed by powder XRD. The only product that can be determined by XRD was metallic ruthenium (Fig. S6).

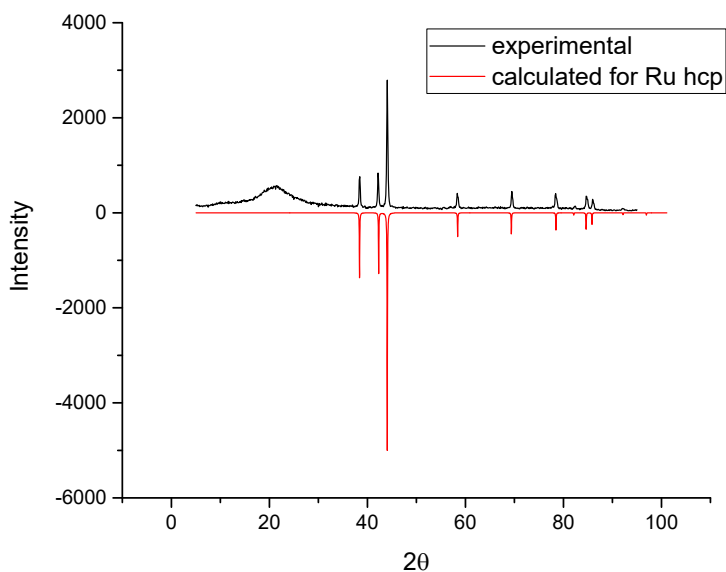

**Figure S9.** Experimental XRD pattern for the residue after thermal decomposition of  $[RuNO(H_2O)_2(inic)_2(OH)] \cdot xH_2O$  in  $Ar/H_2$  atmosphere ( $600^\circ C$ ) and theoretical XRD for HCP ruthenium.

Thus, the data of elemental analysis and TG-MS confirm the formula  $[RuNO(H_2O)_2(inic)_2(OH)] \cdot xH_2O$ , where  $x$  is in the range 1-2.

## Model 1

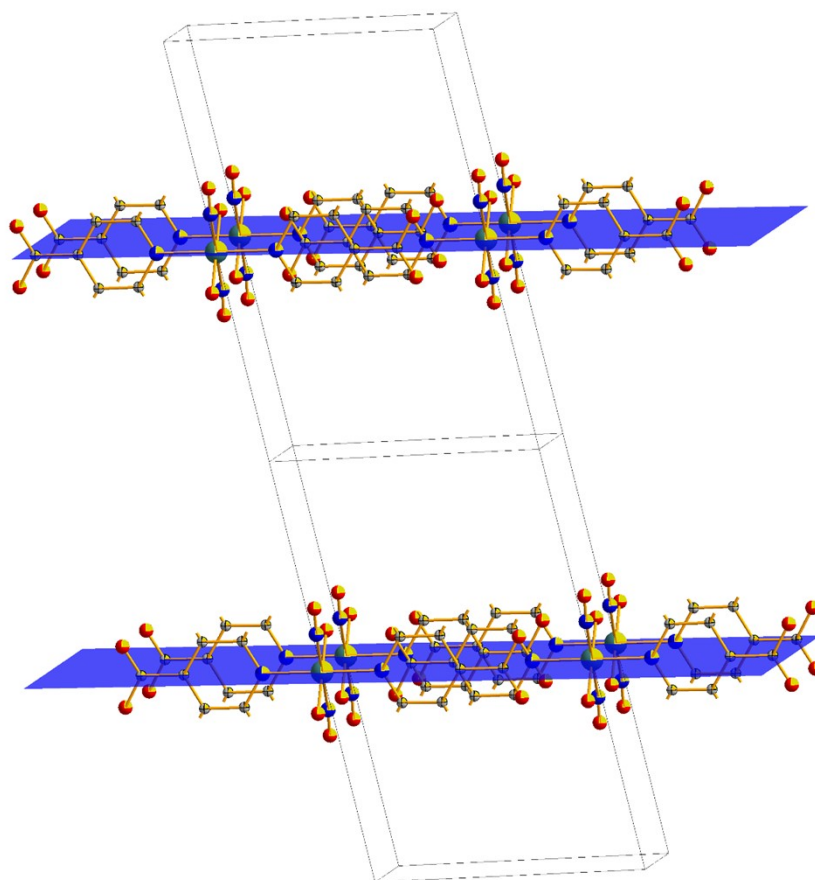

**Figure S10.** The crystal package in Model 1. Planes corresponding to complex layers are built as average for ruthenium atoms and nitrogen atoms of heterocycles.

The model was fitted with only one layer of complexes in the unit cell. SQUEZZE procedure of Platon determined Solvent Accessible Volume = 590 Å<sup>3</sup> per unit cell and electrons found in S.A.V. = 305.

**Table S2.** Crystal data and structure refinement for Model 1

|                   |                                                                 |
|-------------------|-----------------------------------------------------------------|
| Empirical formula | C <sub>12</sub> H <sub>8</sub> N <sub>4</sub> O <sub>7</sub> Ru |
| Formula weight    | 421.29                                                          |
| Temperature/K     | 173(2)                                                          |
| Crystal system    | triclinic                                                       |
| Space group       | P-1                                                             |
| a/Å               | 6.7164(7)                                                       |
| b/Å               | 9.6430(12)                                                      |
| c/Å               | 15.5894(18)                                                     |

|                                                |                                                               |
|------------------------------------------------|---------------------------------------------------------------|
| $\alpha/^\circ$                                | 75.772(7)                                                     |
| $\beta/^\circ$                                 | 77.973(4)                                                     |
| $\gamma/^\circ$                                | 69.733(4)                                                     |
| Volume/ $\text{\AA}^3$                         | 909.63(19)                                                    |
| Z                                              | 1                                                             |
| $\rho_{\text{calc}}/\text{g/cm}^3$             | 0.769                                                         |
| $\mu/\text{mm}^{-1}$                           | 0.450                                                         |
| F(000)                                         | 208.0                                                         |
| Crystal size/ $\text{mm}^3$                    | $0.280 \times 0.130 \times 0.040$                             |
| Radiation                                      | MoK $\alpha$ ( $\lambda = 0.71073$ )                          |
| 2 $\Theta$ range for data collection/ $^\circ$ | 2.72 to 59.454                                                |
| Index ranges                                   | $-9 \leq h \leq 9, -13 \leq k \leq 13, -21 \leq l \leq 21$    |
| Reflections collected                          | 15240                                                         |
| Independent reflections                        | 5118 [ $R_{\text{int}} = 0.0797, R_{\text{sigma}} = 0.0896$ ] |
| Data/restraints/parameters                     | 5118/6/115                                                    |
| Goodness-of-fit on $F^2$                       | 1.152                                                         |
| Final R indexes [ $I \geq 2\sigma(I)$ ]        | $R_1 = 0.0744, wR_2 = 0.1945$                                 |
| Final R indexes [all data]                     | $R_1 = 0.0764, wR_2 = 0.1969$                                 |
| Largest diff. peak/hole / $e \text{\AA}^{-3}$  | 3.10/-2.01                                                    |

#### Bond Lengths

| Atom | Atom              | Length/ $\text{\AA}$ | Atom | Atom | Length/ $\text{\AA}$ |
|------|-------------------|----------------------|------|------|----------------------|
| Ru01 | N1                | 1.923(5)             | O118 | C117 | 1.214(9)             |
| Ru01 | N1 <sup>1</sup>   | 1.923(5)             | N1   | O2   | 1.027(14)            |
| Ru01 | O1                | 1.981(5)             | C114 | C113 | 1.334(9)             |
| Ru01 | O1 <sup>1</sup>   | 1.981(5)             | C114 | C115 | 1.371(9)             |
| Ru01 | N111 <sup>1</sup> | 2.086(4)             | C114 | C117 | 1.491(8)             |
| Ru01 | N111              | 2.086(4)             | C116 | C115 | 1.397(7)             |
| N111 | C112              | 1.333(7)             | C112 | C113 | 1.401(7)             |
| N111 | C116              | 1.345(7)             | O119 | C117 | 1.251(9)             |

<sup>1</sup>2-X,-Y,1-Z

#### Bond Angles

| Atom            | Atom | Atom            | Angle/ $^\circ$ | Atom | Atom | Atom | Angle/ $^\circ$ |
|-----------------|------|-----------------|-----------------|------|------|------|-----------------|
| N1              | Ru01 | N1 <sup>1</sup> | 180.0(4)        | C112 | N111 | C116 | 118.9(4)        |
| N1              | Ru01 | O1              | 90.7(3)         | C112 | N111 | Ru01 | 120.5(4)        |
| N1 <sup>1</sup> | Ru01 | O1              | 89.3(3)         | C116 | N111 | Ru01 | 120.6(3)        |
| N1              | Ru01 | O1 <sup>1</sup> | 89.3(3)         | O2   | N1   | Ru01 | 159.8(10)       |
| N1 <sup>1</sup> | Ru01 | O1 <sup>1</sup> | 90.7(3)         | C113 | C114 | C115 | 119.1(5)        |

|                   |      |                   |           |      |      |      |          |
|-------------------|------|-------------------|-----------|------|------|------|----------|
| O1                | Ru01 | O1 <sup>1</sup>   | 180.0     | C113 | C114 | C117 | 120.9(6) |
| N1                | Ru01 | N111 <sup>1</sup> | 89.84(19) | C115 | C114 | C117 | 120.1(6) |
| N1 <sup>1</sup>   | Ru01 | N111 <sup>1</sup> | 90.16(19) | N111 | C116 | C115 | 121.1(5) |
| O1                | Ru01 | N111 <sup>1</sup> | 90.66(17) | C114 | C115 | C116 | 119.3(5) |
| O1 <sup>1</sup>   | Ru01 | N111 <sup>1</sup> | 89.34(17) | N111 | C112 | C113 | 121.0(5) |
| N1                | Ru01 | N111              | 90.16(19) | C114 | C113 | C112 | 120.6(6) |
| N1 <sup>1</sup>   | Ru01 | N111              | 89.84(19) | O118 | C117 | O119 | 120.0(7) |
| O1                | Ru01 | N111              | 89.34(17) | O118 | C117 | C114 | 120.9(6) |
| O1 <sup>1</sup>   | Ru01 | N111              | 90.66(17) | O119 | C117 | C114 | 119.1(6) |
| N111 <sup>1</sup> | Ru01 | N111              | 180.0     |      |      |      |          |



## Model 2

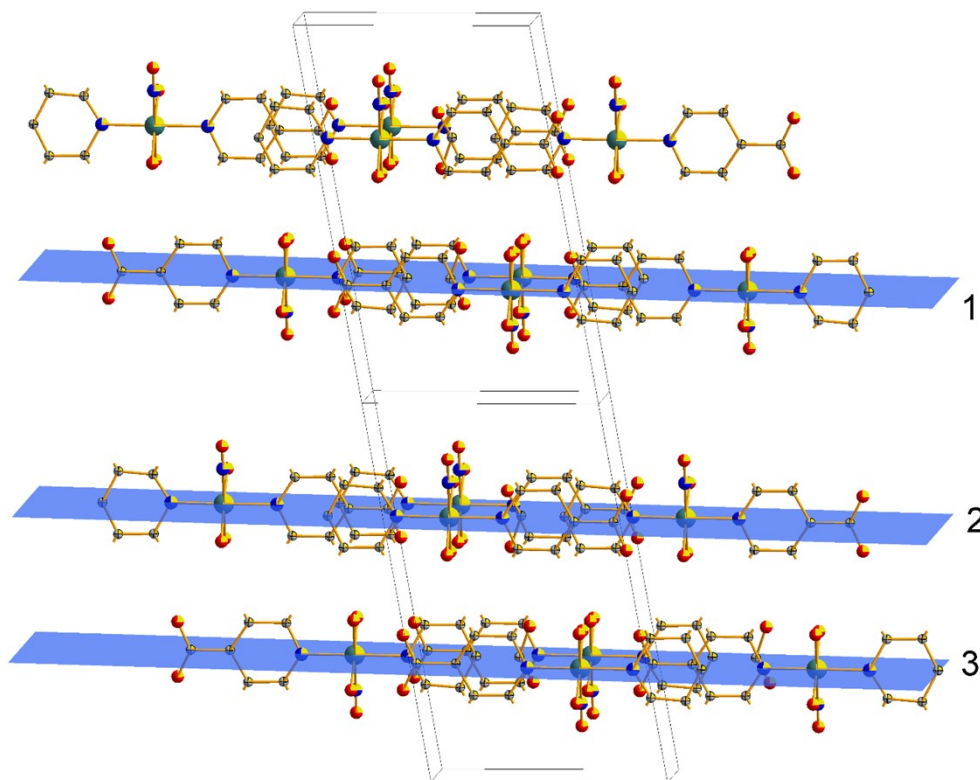

**Figure S11.** The crystal package in Model 2. Planes corresponding to complex layers are built as average for ruthenium atoms and nitrogen atoms of heterocycles.

The model was fitted with two layers of complexes in the unit cell. Interplane distance between planes 2 and 3 is equal to 5.706 Å, between planes 1 and 2 – 9.265 Å. SQUEZZE procedure of Platon determined Solvent Accessible Volume = 232 Å<sup>3</sup> electrons found in S.A.V. = 131. Solvent accessible volume is located between planes 1 and 2.

**Table S3.** Crystal data and structure refinement for Model 2

|                     |                                                                 |
|---------------------|-----------------------------------------------------------------|
| Identification code | Model 2                                                         |
| Empirical formula   | C <sub>12</sub> H <sub>8</sub> N <sub>3</sub> O <sub>8</sub> Ru |
| Formula weight      | 423.28                                                          |
| Temperature/K       | 173(2)                                                          |
| Crystal system      | triclinic                                                       |
| Space group         | P-1                                                             |
| a/Å                 | 6.7164(7)                                                       |
| b/Å                 | 9.6430(12)                                                      |
| c/Å                 | 15.5894(18)                                                     |
| α/°                 | 75.772(7)                                                       |

|                                                |                                                               |
|------------------------------------------------|---------------------------------------------------------------|
| $\beta/^\circ$                                 | 77.973(4)                                                     |
| $\gamma/^\circ$                                | 69.733(4)                                                     |
| Volume/ $\text{\AA}^3$                         | 909.63(19)                                                    |
| Z                                              | 2                                                             |
| $\rho_{\text{calc}}/\text{g}/\text{cm}^3$      | 1.545                                                         |
| $\mu/\text{mm}^{-1}$                           | 0.902                                                         |
| F(000)                                         | 418.0                                                         |
| Crystal size/ $\text{mm}^3$                    | $0.280 \times 0.130 \times 0.040$                             |
| Radiation                                      | MoK $\alpha$ ( $\lambda = 0.71073$ )                          |
| 2 $\theta$ range for data collection/ $^\circ$ | 2.72 to 59.454                                                |
| Index ranges                                   | $-9 \leq h \leq 9, -13 \leq k \leq 13, -21 \leq l \leq 21$    |
| Reflections collected                          | 15240                                                         |
| Independent reflections                        | 5118 [ $R_{\text{int}} = 0.0728, R_{\text{sigma}} = 0.0831$ ] |
| Data/restraints/parameters                     | 5118/0/98                                                     |
| Goodness-of-fit on $F^2$                       | 2.116                                                         |
| Final R indexes [ $I \geq 2\sigma(I)$ ]        | $R_1 = 0.1872, wR_2 = 0.4513$                                 |
| Final R indexes [all data]                     | $R_1 = 0.1902, wR_2 = 0.4636$                                 |
| Largest diff. peak/hole / $e \text{\AA}^{-3}$  | 7.92/-3.55                                                    |

#### Bond Lengths

| Atom | Atom | Length/ $\text{\AA}$ | Atom | Atom | Length/ $\text{\AA}$ |
|------|------|----------------------|------|------|----------------------|
| Ru1  | N1   | 1.868(12)            | C212 | N211 | 1.295(16)            |
| Ru1  | O1   | 1.926(12)            | C212 | C213 | 1.39(2)              |
| Ru1  | O3   | 2.015(11)            | N111 | C112 | 1.311(15)            |
| Ru1  | O2   | 2.022(13)            | N111 | C116 | 1.393(16)            |
| Ru1  | N111 | 2.071(11)            | N211 | C216 | 1.375(17)            |
| Ru1  | N211 | 2.075(12)            | C216 | C215 | 1.45(2)              |
| C214 | C215 | 1.349(19)            | C112 | C113 | 1.363(17)            |
| C214 | C213 | 1.435(18)            | C113 | C114 | 1.38(2)              |
| C214 | C217 | 1.54(2)              | C117 | O119 | 1.37(2)              |
| O118 | C117 | 1.15(2)              | C117 | C114 | 1.69(2)              |
| O219 | C217 | 1.209(19)            | C115 | C114 | 1.38(2)              |
| O218 | C217 | 1.207(19)            | C115 | C116 | 1.40(2)              |
| O4   | N1   | 1.066(16)            |      |      |                      |

#### Bond Angles

| Atom | Atom | Atom | Angle/ $^\circ$ | Atom | Atom | Atom | Angle/ $^\circ$ |
|------|------|------|-----------------|------|------|------|-----------------|
|------|------|------|-----------------|------|------|------|-----------------|

|      |      |      |           |      |      |      |           |
|------|------|------|-----------|------|------|------|-----------|
| N1   | Ru1  | O1   | 177.4(4)  | C116 | N111 | Ru1  | 117.7(8)  |
| N1   | Ru1  | O3   | 90.0(5)   | C212 | N211 | C216 | 121.0(12) |
| O1   | Ru1  | O3   | 87.4(5)   | C212 | N211 | Ru1  | 122.4(9)  |
| N1   | Ru1  | O2   | 93.7(5)   | C216 | N211 | Ru1  | 116.6(9)  |
| O1   | Ru1  | O2   | 88.9(5)   | O4   | N1   | Ru1  | 170.1(12) |
| O3   | Ru1  | O2   | 176.1(4)  | N211 | C216 | C215 | 116.4(12) |
| N1   | Ru1  | N111 | 91.5(5)   | C212 | C213 | C214 | 118.2(13) |
| O1   | Ru1  | N111 | 88.6(5)   | N111 | C112 | C113 | 127.0(11) |
| O3   | Ru1  | N111 | 89.4(4)   | O218 | C217 | O219 | 128.9(16) |
| O2   | Ru1  | N111 | 91.8(5)   | O218 | C217 | C214 | 115.3(13) |
| N1   | Ru1  | N211 | 90.6(5)   | O219 | C217 | C214 | 115.2(13) |
| O1   | Ru1  | N211 | 89.1(5)   | C214 | C215 | C216 | 123.4(14) |
| O3   | Ru1  | N211 | 87.5(4)   | C112 | C113 | C114 | 112.3(12) |
| O2   | Ru1  | N211 | 91.2(5)   | O118 | C117 | O119 | 132.9(17) |
| N111 | Ru1  | N211 | 176.3(3)  | O118 | C117 | C114 | 118.2(15) |
| C215 | C214 | C213 | 116.4(12) | O119 | C117 | C114 | 108.7(13) |
| C215 | C214 | C217 | 123.5(12) | C114 | C115 | C116 | 116.0(12) |
| C213 | C214 | C217 | 120.0(11) | N111 | C116 | C115 | 119.3(11) |
| N211 | C212 | C213 | 124.5(12) | C113 | C114 | C115 | 126.2(15) |
| C112 | N111 | C116 | 118.9(11) | C113 | C114 | C117 | 116.5(13) |
| C112 | N111 | Ru1  | 123.2(8)  | C115 | C114 | C117 | 117.1(13) |

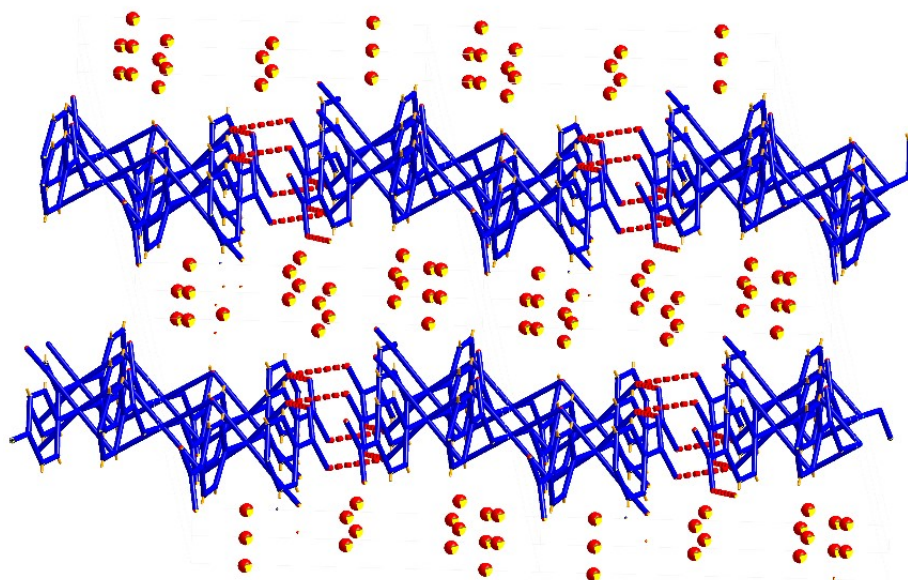

**Figure S12.** The view on the crystal cell of  $\{\text{Zn}[\text{RuNO}(\text{H}_2\text{O})(\text{inic})_2(\text{OH})_2]\}_2 \cdot 12\text{H}_2\text{O}$  along b-axis.

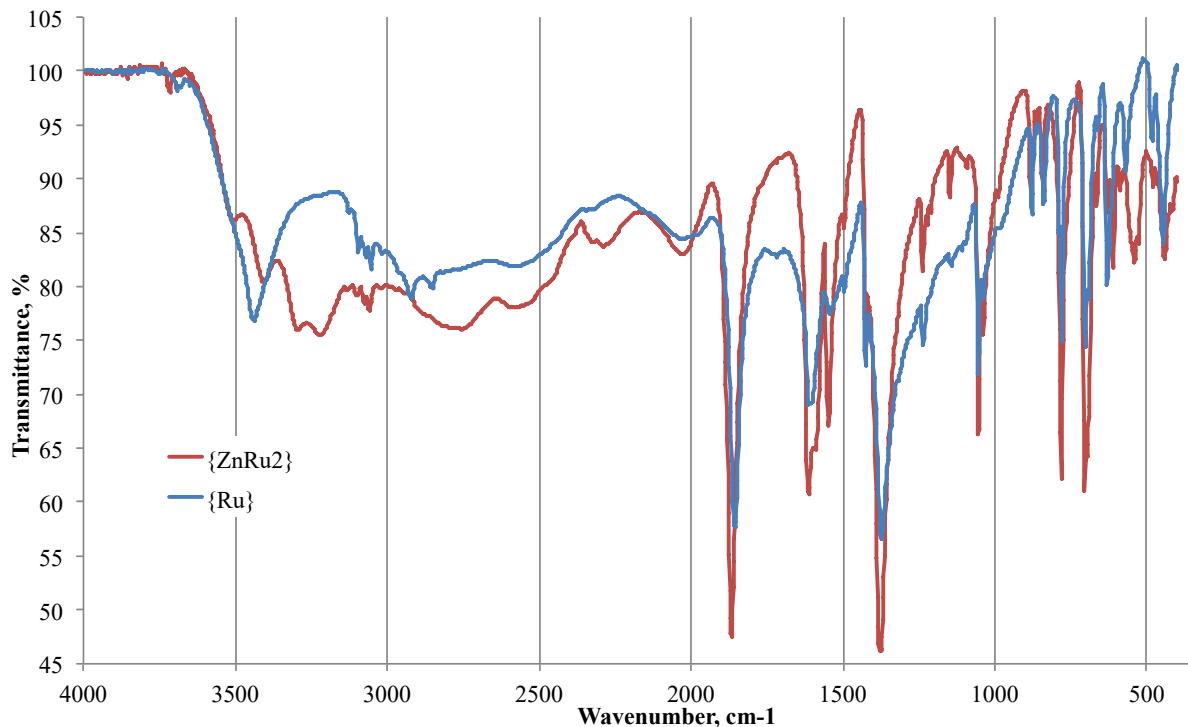

**Figure S13.** FTIR spectra of *trans*-{Zn[RuNO(H<sub>2</sub>O)(inic)<sub>2</sub>(OH)<sub>2</sub>]<sub>2</sub>}·12H<sub>2</sub>O (red) and *trans*-[RuNO(H<sub>2</sub>O)<sub>2</sub>(inic)<sub>2</sub>(OH)]·H<sub>2</sub>O (blue) complexes.

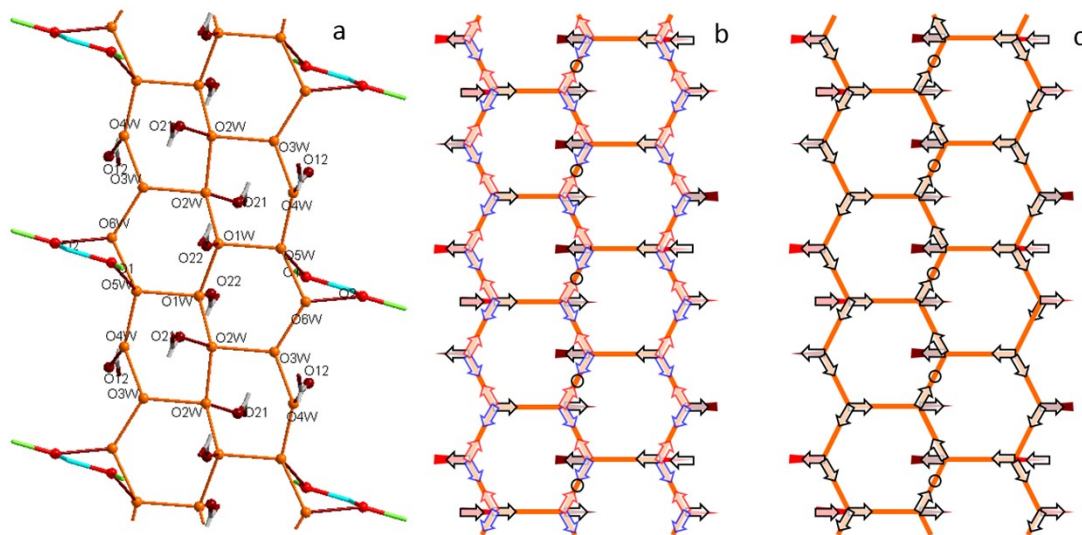

**Figure S14.** Explanation of hydrogen atoms distribution over the hydrogen bond networks of [Zn{RuNO(H<sub>2</sub>O)(inic)<sub>2</sub>(OH)<sub>2</sub>]<sub>2</sub>}·12H<sub>2</sub>O: (a) oxygen atoms labeling (green for Ru, cyan for Zn, red for bridging hydroxyl O, brown for carboxyl O, orange for solvate water O); (b) probable averaged distribution of H atoms over the hydrogen bond

network of the water ribbons (black arrows – “ordered” H, red and blue arrows – alternative positioning of “disordered” H, black circles – inversion centers); (c) a variant of local (“ordered”) distribution of H atoms over the hydrogen bond network.

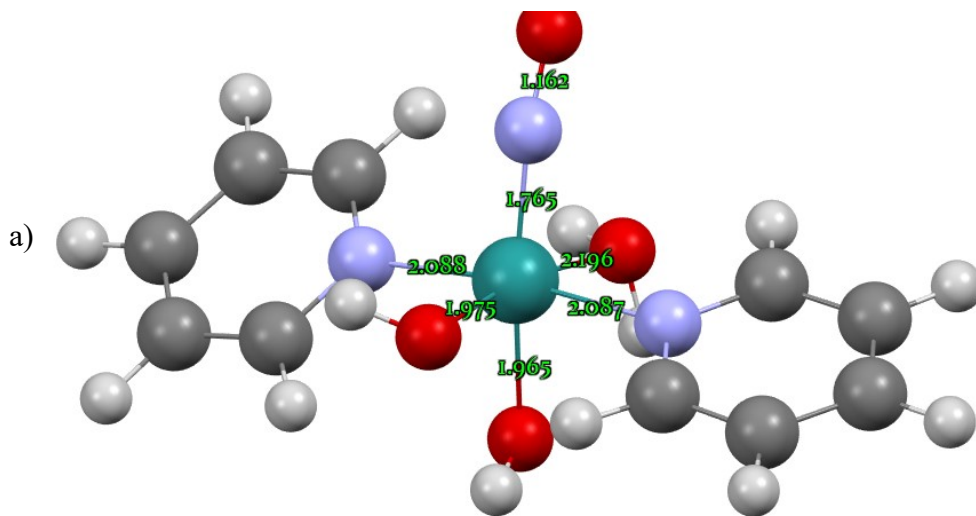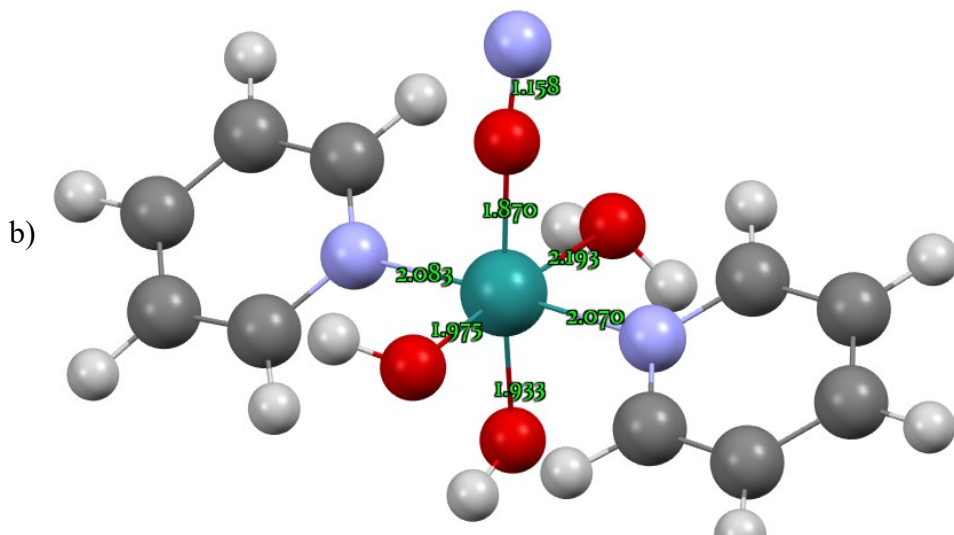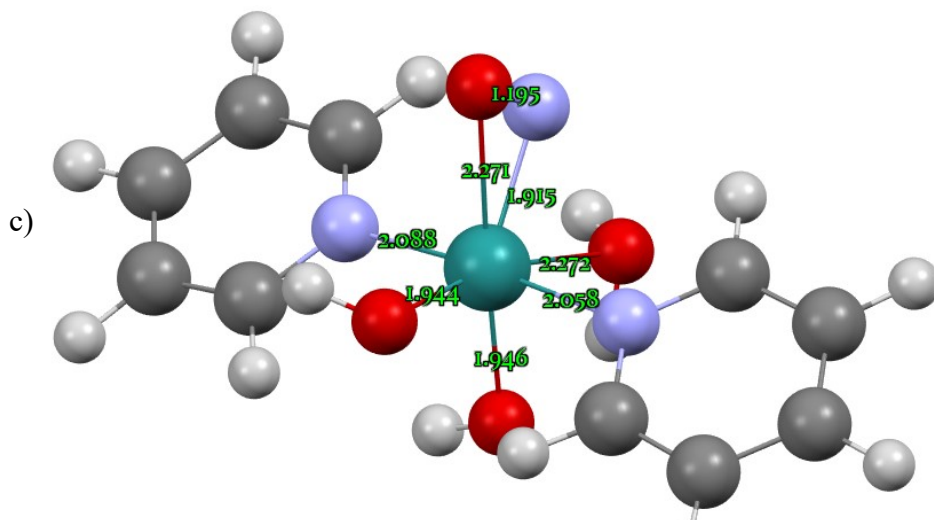

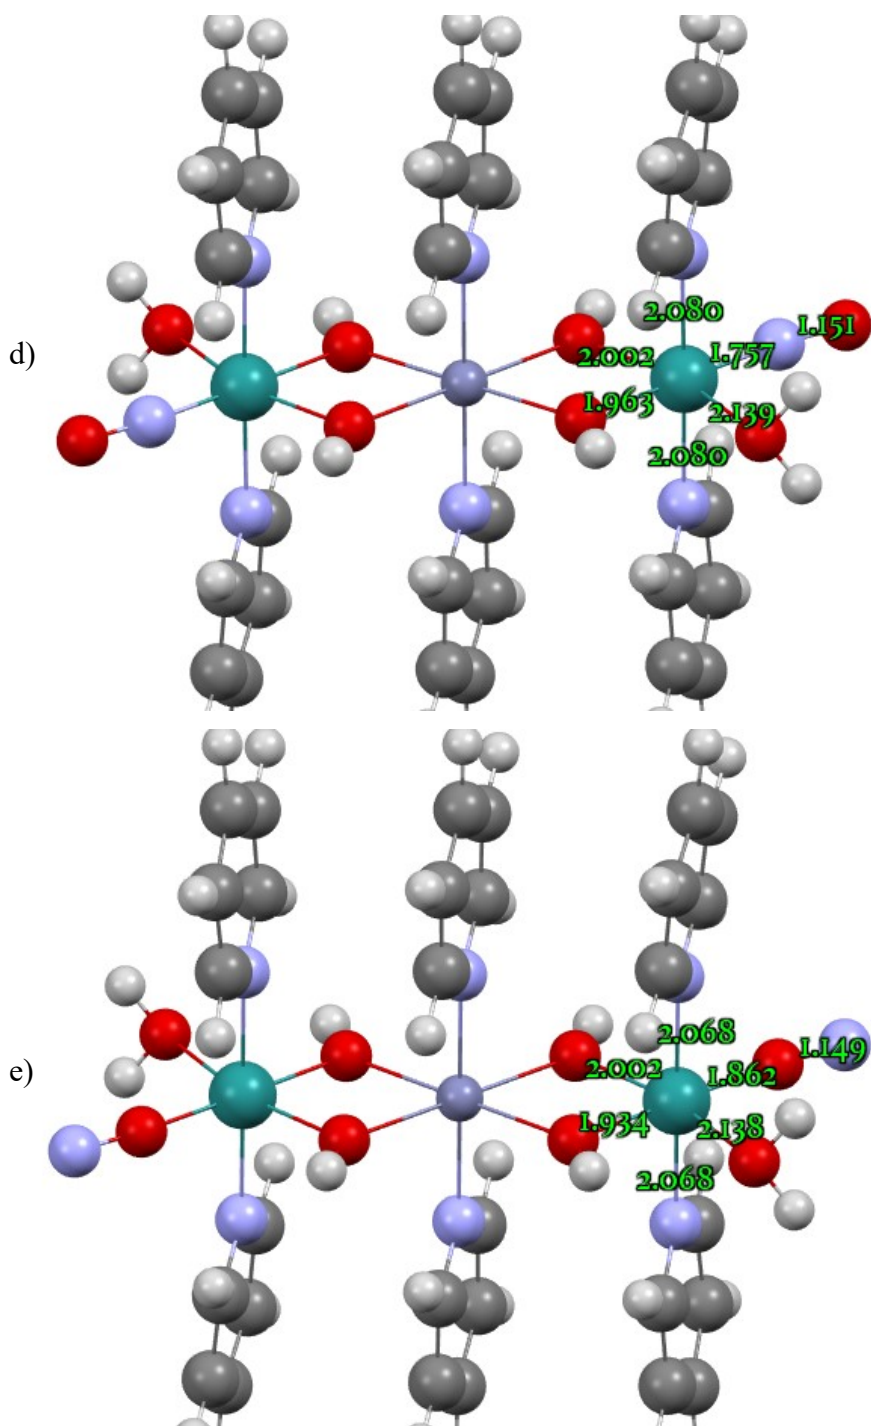

**Figure S15.** The DFT optimized structures (OPBE/TZP/COSMO) of the model compounds  $trans\text{-}[\text{RuNO}(\text{Py})_2(\text{OH})_2(\text{H}_2\text{O})]^+$  with the a) *N*-, b) *O*-, c) side-coordinated nitrosyl group and  $trans\text{-}\{\text{Zn}(\text{Py})_2[\text{RuNO}(\text{Py})_2(\text{OH})_2(\text{H}_2\text{O})]_2\}^{4+}$  with d) *N*- or e) *O*-coordinated nitrosyl groups.



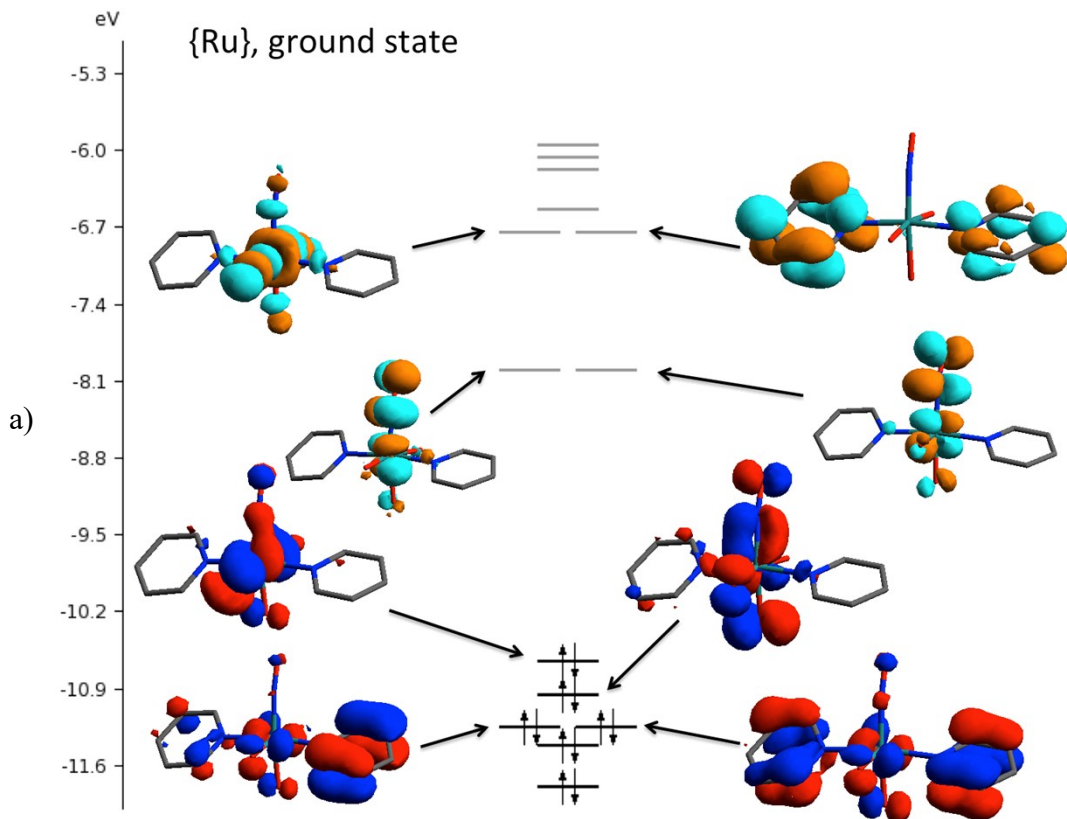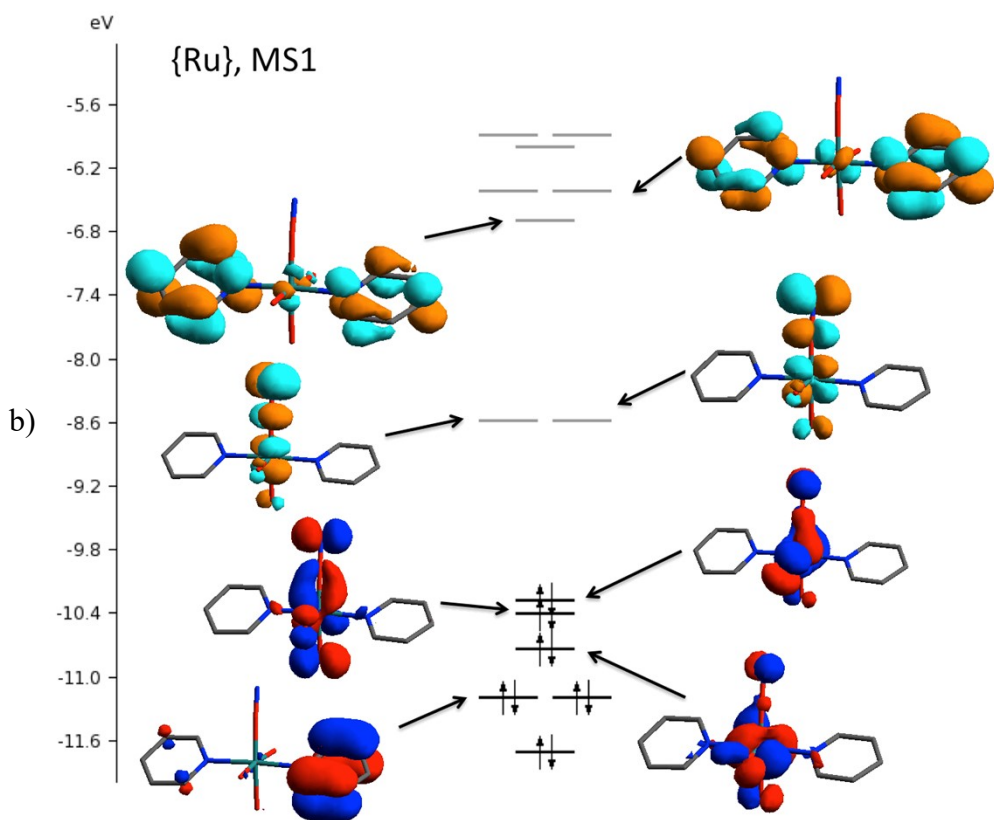

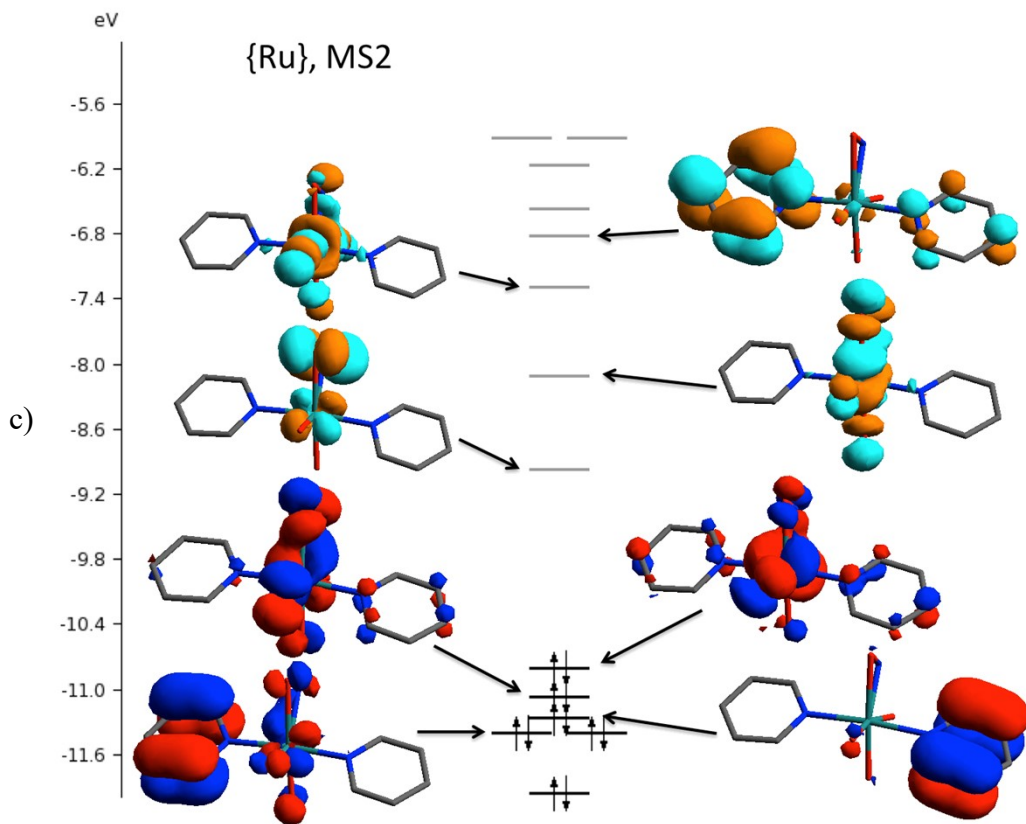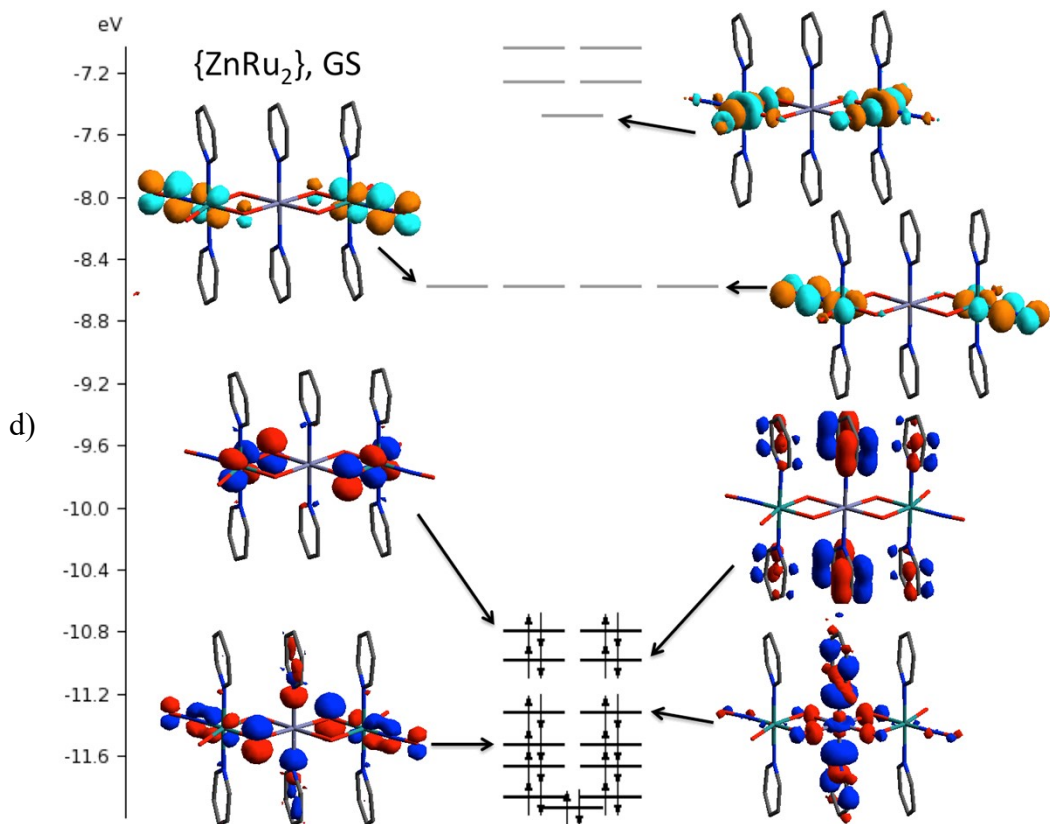

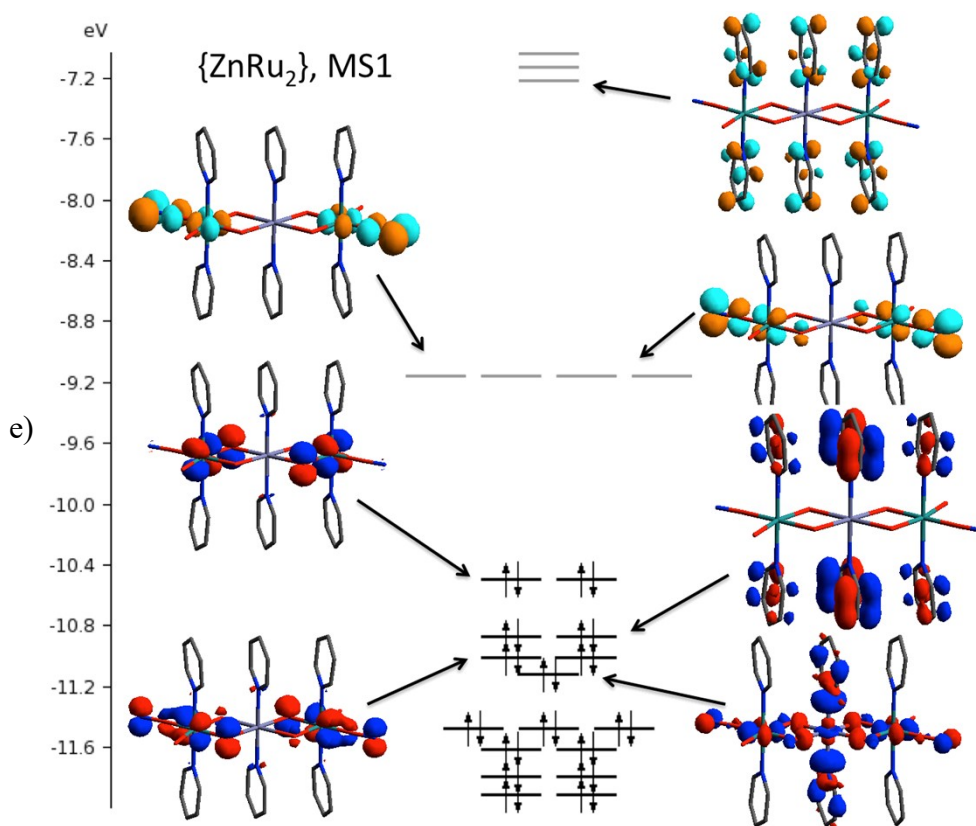

**Figure S16.** The DFT molecular orbitals (SAOP/TZP/COSMO) of the model compounds  $trans$ -[RuNO(Py)<sub>2</sub>(OH)<sub>2</sub>(H<sub>2</sub>O)]<sup>+</sup> with the a) *N*-, b) *O*-, c) side-coordinated nitrosyl group and  $trans$ -{Zn(Py)<sub>2</sub>[RuNO(Py)<sub>2</sub>(OH)<sub>2</sub>(H<sub>2</sub>O)]<sub>2</sub>}<sup>4+</sup> with d) *N*- or e) *O*-coordinated NO.

**Table S4.** The computed nitrosyl valence vibration modes (OPBE/TZP/COSMO) in the model compounds  $trans$ -[RuNO(Py)<sub>2</sub>(OH)<sub>2</sub>(H<sub>2</sub>O)]<sup>+</sup>, denoted as {Ru}, and  $trans$ -{Zn(Py)<sub>2</sub>[RuNO(Py)<sub>2</sub>(OH)<sub>2</sub>(H<sub>2</sub>O)]<sub>2</sub>}<sup>4+</sup>, denoted as {ZnRu<sub>2</sub>}.

| Model compound       | Nitrosyl coordination | $\nu(\text{NO})$ , cm <sup>-1</sup> | Exp. data, cm <sup>-1</sup> |
|----------------------|-----------------------|-------------------------------------|-----------------------------|
| {Ru}                 | <i>N</i> -coordinated | 1847                                | 1865                        |
|                      | <i>O</i> -coordinated | 1801                                | 1720                        |
|                      | side-coordinated      | 1596                                |                             |
| {ZnRu <sub>2</sub> } | <i>N</i> -coordinated | 1909                                | 1873                        |
|                      | <i>O</i> -coordinated | 1848                                | 1720                        |

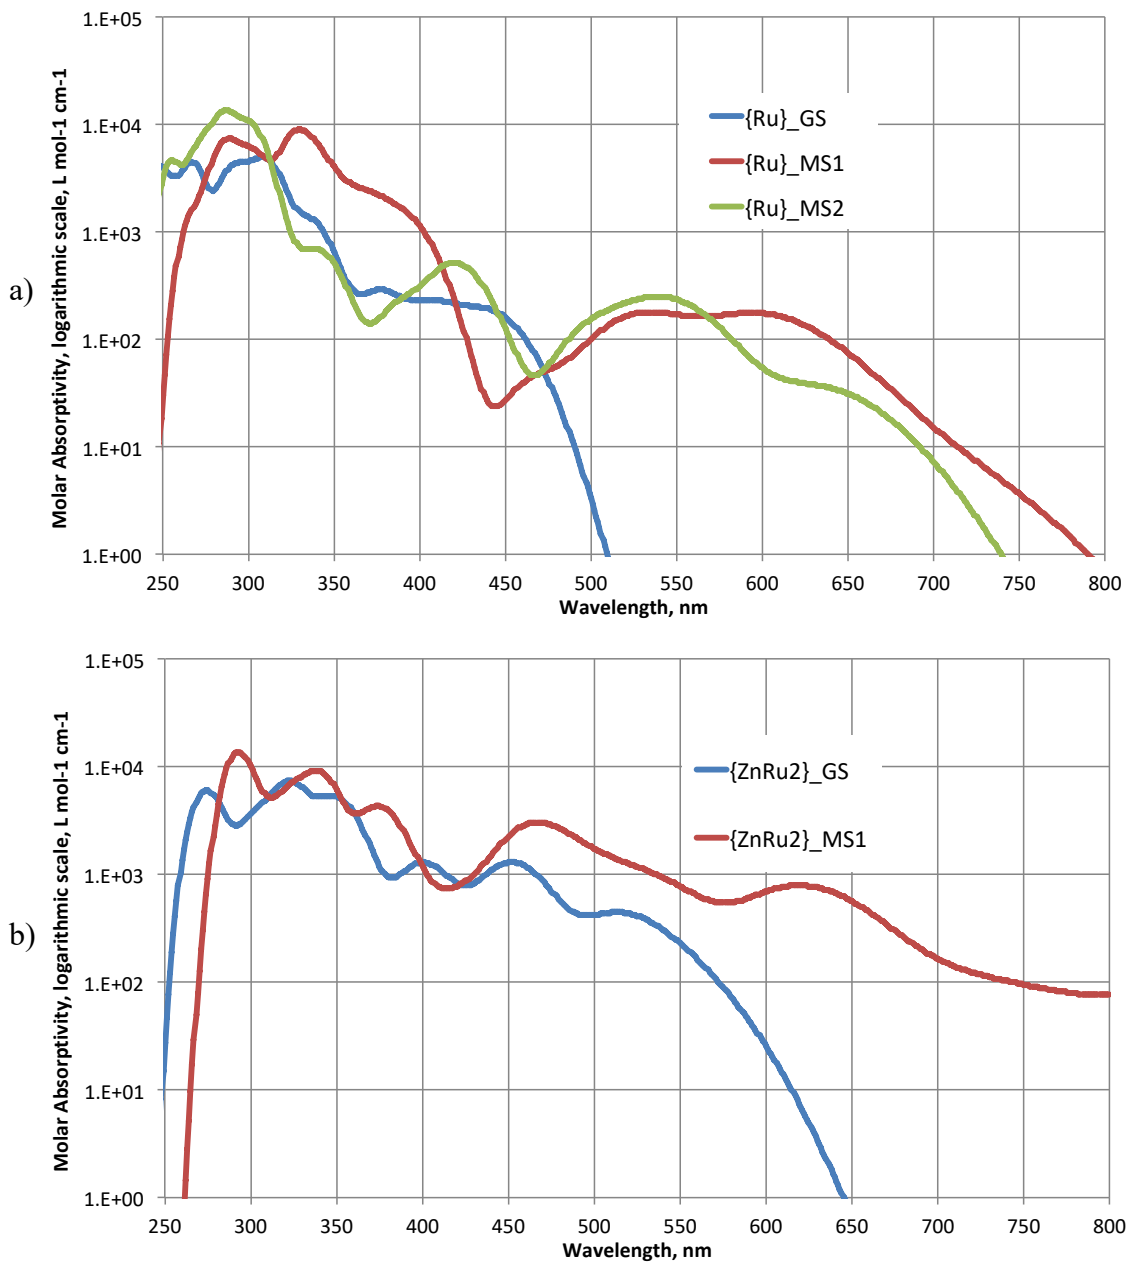

**Figure S17.** The simulated absorption spectra (SAOP/TZP/COSMO) of the model compounds a) *trans*-[RuNO(Py)<sub>2</sub>(OH)<sub>2</sub>(H<sub>2</sub>O)]<sup>+</sup> with the *N*-, *O*-, or side-coordinated nitrosyl group in GS, MS1, or MS2 states, respectively, and b) *trans*-{Zn(Py)<sub>2</sub>[RuNO(Py)<sub>2</sub>(OH)<sub>2</sub>(H<sub>2</sub>O)]<sub>2</sub>}<sup>4+</sup> with *N*- or *O*-coordinated NO in GS or MS1 states, respectively. The absorption lines were broadened in the energy scale with the gaussian peaks with 0.25 eV FWHM.

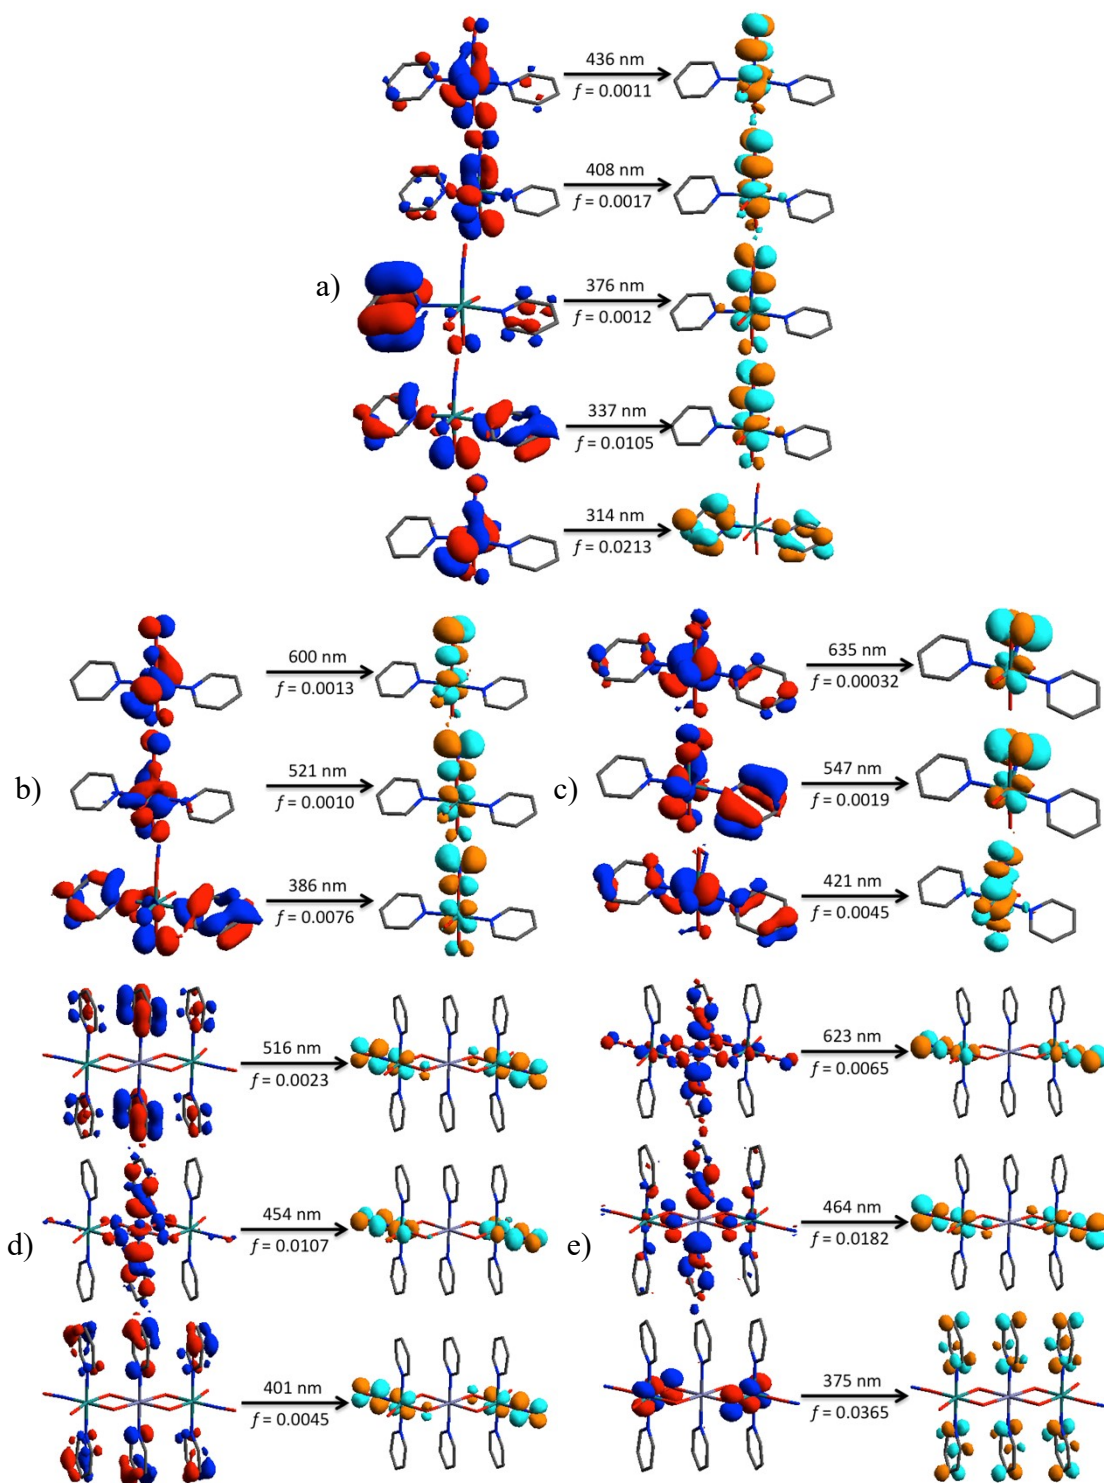

**Figure S18.** The intense computed transitions (SAOP/TZP/COSMO) of the models  $trans$ -[RuNO(Py)<sub>2</sub>(OH)<sub>2</sub>(H<sub>2</sub>O)]<sup>+</sup> with the a) *N*-, b) *O*-, c) side-coordinated NO and  $trans$ -{Zn(Py)<sub>2</sub>[RuNO(Py)<sub>2</sub>(OH)<sub>2</sub>(H<sub>2</sub>O)]<sub>2</sub>}<sup>4+</sup> with d) *N*- or e) *O*-coordinated NO.

## The optimized geometries of the model compounds

*trans*-[RuNO(Py)<sub>2</sub>(OH)<sub>2</sub>(H<sub>2</sub>O)]<sup>+</sup>, GS *N*-coordinated NO

32

|    |          |           |          |
|----|----------|-----------|----------|
| Ru | 5.108121 | 1.058205  | 3.353199 |
| O  | 5.388632 | 0.307102  | 1.559655 |
| O  | 7.001968 | 0.743955  | 3.819180 |
| N  | 5.717853 | 2.890368  | 2.561867 |
| C  | 7.011239 | 3.098020  | 2.282275 |
| C  | 6.520384 | 5.241443  | 1.351674 |
| H  | 6.835698 | 6.163349  | 0.869744 |
| C  | 4.817778 | 3.835283  | 2.258311 |
| C  | 5.182782 | 5.018893  | 1.645571 |
| C  | 5.440021 | -1.882307 | 3.657471 |
| N  | 4.581532 | -0.883713 | 3.911404 |
| C  | 7.447448 | 4.265311  | 1.684362 |
| C  | 5.134087 | -3.201505 | 3.938635 |
| C  | 2.996381 | -2.474575 | 4.711677 |
| C  | 3.381864 | -1.175858 | 4.436165 |
| O  | 3.133097 | 1.396205  | 2.453833 |
| O  | 3.913697 | 2.308811  | 5.692643 |
| N  | 4.516369 | 1.792032  | 4.844790 |
| C  | 3.889420 | -3.508320 | 4.466894 |
| H  | 3.617346 | -4.538826 | 4.683204 |
| H  | 5.871399 | -3.972875 | 3.733779 |
| H  | 6.387542 | -1.600918 | 3.213690 |
| H  | 2.005430 | -2.662036 | 5.115078 |
| H  | 2.716502 | -0.344084 | 4.642757 |
| H  | 7.694486 | 2.305377  | 2.561947 |
| H  | 8.507802 | 4.392859  | 1.485543 |
| H  | 3.784083 | 3.625147  | 2.505318 |
| H  | 4.415412 | 5.748150  | 1.402683 |
| H  | 7.009850 | 0.045700  | 4.491517 |
| H  | 6.351443 | 0.245885  | 1.457109 |
| H  | 2.558439 | 0.629032  | 2.609367 |
| H  | 3.377684 | 1.288982  | 1.516494 |

*trans*-[RuNO(Py)<sub>2</sub>(OH)<sub>2</sub>(H<sub>2</sub>O)]<sup>+</sup>, MS1 *O*-coordinated NO

32

|    |          |           |          |
|----|----------|-----------|----------|
| Ru | 5.030902 | 1.032624  | 3.194303 |
| O  | 6.578093 | 0.222693  | 2.365241 |
| O  | 6.089932 | 1.452677  | 4.807098 |
| N  | 5.627255 | 2.868749  | 2.448470 |
| C  | 4.901541 | 3.497331  | 1.512637 |
| C  | 6.450747 | 5.309415  | 1.442333 |
| H  | 6.775305 | 6.268302  | 1.046454 |
| C  | 6.756743 | 3.437073  | 2.892543 |
| C  | 7.191409 | 4.660315  | 2.418953 |
| C  | 5.410904 | -1.559944 | 4.630587 |

|   |          |           |          |
|---|----------|-----------|----------|
| N | 4.525352 | -0.858944 | 3.905619 |
| C | 5.287514 | 4.711675  | 0.979348 |
| C | 5.136056 | -2.831166 | 5.101291 |
| C | 3.010506 | -2.700400 | 4.023878 |
| C | 3.341276 | -1.422001 | 3.614173 |
| O | 4.030559 | 0.585571  | 1.295159 |
| N | 2.340815 | 2.153919  | 3.983229 |
| O | 3.407619 | 1.753670  | 3.779336 |
| C | 3.919692 | -3.419419 | 4.786929 |
| H | 3.683424 | -4.424293 | 5.129072 |
| H | 5.878815 | -3.348249 | 5.702479 |
| H | 6.361818 | -1.078472 | 4.827798 |
| H | 2.048474 | -3.118345 | 3.740897 |
| H | 2.640966 | -0.829431 | 3.034917 |
| H | 3.988507 | 3.010905  | 1.188073 |
| H | 4.673803 | 5.172367  | 0.210854 |
| H | 7.298085 | 2.892297  | 3.656131 |
| H | 8.104248 | 5.089766  | 2.822522 |
| H | 5.784863 | 0.850815  | 5.502993 |
| H | 7.289748 | 0.344419  | 3.015961 |
| H | 3.971547 | -0.379378 | 1.201134 |
| H | 4.668092 | 0.821718  | 0.601368 |

*trans*-[RuNO(Py)<sub>2</sub>(OH)<sub>2</sub>(H<sub>2</sub>O)]<sup>+</sup>, MS2 side-coordinated NO

32

|    |          |           |          |
|----|----------|-----------|----------|
| Ru | 5.282088 | 1.021388  | 3.313707 |
| O  | 4.941725 | 0.658670  | 1.432633 |
| O  | 7.144069 | 0.473920  | 3.201687 |
| N  | 5.862564 | 2.868682  | 2.616493 |
| C  | 6.858126 | 2.905128  | 1.719695 |
| C  | 6.467575 | 5.222709  | 1.306907 |
| H  | 6.697095 | 6.146344  | 0.781881 |
| C  | 5.167224 | 3.984126  | 2.879304 |
| C  | 5.441431 | 5.177388  | 2.240111 |
| C  | 5.308524 | -1.965307 | 3.275597 |
| N  | 4.689329 | -0.911226 | 3.836973 |
| C  | 7.192099 | 4.067393  | 1.052730 |
| C  | 4.959359 | -3.271913 | 3.566250 |
| C  | 3.266236 | -2.427010 | 5.016736 |
| C  | 3.677366 | -1.148825 | 4.690862 |
| O  | 3.168522 | 1.744796  | 2.897056 |
| O  | 5.664144 | 1.540031  | 5.491475 |
| N  | 4.602641 | 1.707149  | 4.968004 |
| C  | 3.921866 | -3.513118 | 4.453703 |
| H  | 3.625127 | -4.529923 | 4.700569 |
| H  | 5.503958 | -4.084506 | 3.093774 |
| H  | 6.105993 | -1.741118 | 2.574122 |
| H  | 2.439354 | -2.557575 | 5.709321 |
| H  | 3.186640 | -0.285347 | 5.126792 |
| H  | 7.376496 | 1.970280  | 1.543725 |
| H  | 8.007372 | 4.049036  | 0.335220 |
| H  | 4.364390 | 3.900746  | 3.602479 |
| H  | 4.840923 | 6.052142  | 2.472253 |



|   |          |           |          |
|---|----------|-----------|----------|
| H | 7.233715 | -0.349731 | 3.706686 |
| H | 4.664456 | -0.270951 | 1.372391 |
| H | 2.509954 | 1.112121  | 3.225525 |
| H | 3.300839 | 1.472179  | 1.962324 |

{Zn[RuNO(Py)<sub>2</sub>(OH)<sub>2</sub>(H<sub>2</sub>O)]<sup>4+</sup>, GS *N*-coordinated NO

87

|    |           |           |           |
|----|-----------|-----------|-----------|
| Zn | 0.000000  | 0.000000  | 0.000000  |
| O  | 2.050172  | -0.216817 | 0.000000  |
| H  | -0.896689 | -1.955096 | -4.648897 |
| O  | 0.414176  | -2.127432 | 0.000000  |
| H  | -0.003698 | -2.995459 | 0.000000  |
| H  | 2.820101  | 0.364650  | 0.000000  |
| Ru | 2.415938  | -2.145543 | 0.000000  |
| N  | 2.790349  | -3.861705 | 0.000000  |
| O  | 3.168005  | -4.949300 | 0.000000  |
| O  | 4.447612  | -1.475338 | 0.000000  |
| H  | 4.940288  | -1.814410 | 0.765082  |
| O  | -3.168005 | 4.949300  | 0.000000  |
| H  | -4.940288 | 1.814410  | 0.765082  |
| H  | 4.940288  | -1.814410 | -0.765082 |
| H  | -4.940288 | 1.814410  | -0.765082 |
| O  | -4.447612 | 1.475338  | 0.000000  |
| N  | -2.790349 | 3.861705  | 0.000000  |
| H  | -2.638238 | 2.295385  | 5.918046  |
| H  | 0.003698  | 2.995459  | 0.000000  |
| O  | -0.414176 | 2.127432  | 0.000000  |
| O  | -2.050172 | 0.216817  | 0.000000  |
| H  | 0.000000  | 0.000000  | -5.930702 |
| H  | -2.820101 | -0.364650 | 0.000000  |
| Ru | -2.415938 | 2.145543  | 0.000000  |
| N  | -2.404217 | 2.132046  | 2.079700  |
| C  | -2.945227 | 1.119449  | 2.766916  |
| C  | -1.912616 | 3.187909  | 2.745772  |
| C  | -3.038404 | 1.142713  | 4.144289  |
| C  | -1.984361 | 3.282499  | 4.119452  |
| C  | -2.564414 | 2.246469  | 4.834686  |
| H  | -3.301710 | 0.275419  | 2.191045  |
| H  | -1.444454 | 3.966632  | 2.156791  |
| H  | -1.579265 | 4.161325  | 4.612314  |
| H  | -3.486255 | 0.297973  | 4.657925  |
| H  | -3.486255 | 0.297973  | -4.657925 |
| H  | 3.486255  | -0.297973 | 4.657925  |
| H  | 3.486255  | -0.297973 | -4.657925 |
| H  | -1.579265 | 4.161325  | -4.612314 |
| H  | 1.579265  | -4.161325 | 4.612314  |
| H  | 1.579265  | -4.161325 | -4.612314 |
| H  | -1.444454 | 3.966632  | -2.156791 |
| H  | 1.444454  | -3.966632 | 2.156791  |
| H  | 1.444454  | -3.966632 | -2.156791 |
| H  | -3.301710 | 0.275419  | -2.191045 |
| H  | 3.301710  | -0.275419 | 2.191045  |
| H  | 3.301710  | -0.275419 | -2.191045 |

|   |           |           |           |
|---|-----------|-----------|-----------|
| H | -2.638238 | 2.295385  | -5.918046 |
| H | 2.638238  | -2.295385 | 5.918046  |
| H | 2.638238  | -2.295385 | -5.918046 |
| N | -2.404217 | 2.132046  | -2.079700 |
| N | 2.404217  | -2.132046 | 2.079700  |
| N | 2.404217  | -2.132046 | -2.079700 |
| C | -2.564414 | 2.246469  | -4.834686 |
| C | 2.564414  | -2.246469 | 4.834686  |
| C | 2.564414  | -2.246469 | -4.834686 |
| C | -1.984361 | 3.282499  | -4.119452 |
| C | 1.984361  | -3.282499 | 4.119452  |
| C | 1.984361  | -3.282499 | -4.119452 |
| C | -3.038404 | 1.142713  | -4.144289 |
| C | 3.038404  | -1.142713 | 4.144289  |
| C | 3.038404  | -1.142713 | -4.144289 |
| C | -1.912616 | 3.187909  | -2.745772 |
| C | 1.912616  | -3.187909 | 2.745772  |
| C | 1.912616  | -3.187909 | -2.745772 |
| C | -2.945227 | 1.119449  | -2.766916 |
| C | 2.945227  | -1.119449 | 2.766916  |
| C | 2.945227  | -1.119449 | -2.766916 |
| N | 0.000000  | 0.000000  | -2.078023 |
| C | -0.481520 | -1.042249 | -2.759871 |
| C | 0.481520  | 1.042249  | -2.759871 |
| C | -0.496096 | -1.084454 | -4.139386 |
| C | 0.496096  | 1.084454  | -4.139386 |
| C | 0.000000  | 0.000000  | -4.843434 |
| H | -0.858749 | -1.866876 | -2.165423 |
| H | 0.858749  | 1.866876  | -2.165423 |
| H | 0.896689  | 1.955096  | -4.648897 |
| H | 0.896689  | 1.955096  | 4.648897  |
| H | -0.896689 | -1.955096 | 4.648897  |
| H | 0.858749  | 1.866876  | 2.165423  |
| H | -0.858749 | -1.866876 | 2.165423  |
| H | 0.000000  | 0.000000  | 5.930702  |
| N | 0.000000  | 0.000000  | 2.078023  |
| C | 0.000000  | 0.000000  | 4.843434  |
| C | 0.496096  | 1.084454  | 4.139386  |
| C | -0.496096 | -1.084454 | 4.139386  |
| C | 0.481520  | 1.042249  | 2.759871  |
| C | -0.481520 | -1.042249 | 2.759871  |

{Zn[RuNO(Py)<sub>2</sub>(OH)<sub>2</sub>(H<sub>2</sub>O)]<sup>4+</sup>, MS1 O-coordinated NO

87

|    |           |           |           |
|----|-----------|-----------|-----------|
| Zn | 0.000000  | 0.000000  | 0.000000  |
| O  | 2.071279  | -0.153935 | 0.000000  |
| H  | -0.959669 | -1.925617 | -4.631214 |
| O  | 0.429936  | -2.087249 | 0.000000  |
| H  | 0.017296  | -2.957369 | 0.000000  |
| H  | 2.863990  | 0.398431  | 0.000000  |
| Ru | 2.431293  | -2.054241 | 0.000000  |
| O  | 2.815227  | -3.875799 | 0.000000  |
| N  | 3.162633  | -4.971210 | 0.000000  |

|    |           |           |           |
|----|-----------|-----------|-----------|
| O  | 4.477189  | -1.434964 | 0.000000  |
| H  | 4.972436  | -1.768047 | 0.765556  |
| N  | -3.162633 | 4.971210  | 0.000000  |
| H  | -4.972436 | 1.768047  | 0.765556  |
| H  | 4.972436  | -1.768047 | -0.765556 |
| H  | -4.972436 | 1.768047  | -0.765556 |
| O  | -4.477189 | 1.434964  | 0.000000  |
| O  | -2.815227 | 3.875799  | 0.000000  |
| H  | -2.630649 | 2.350581  | 5.903048  |
| H  | -0.017296 | 2.957369  | 0.000000  |
| O  | -0.429936 | 2.087249  | 0.000000  |
| O  | -2.071279 | 0.153935  | 0.000000  |
| H  | 0.000000  | 0.000000  | -5.912635 |
| H  | -2.863990 | -0.398431 | 0.000000  |
| Ru | -2.431293 | 2.054241  | 0.000000  |
| N  | -2.418197 | 2.074483  | 2.068244  |
| C  | -2.983143 | 1.096697  | 2.786489  |
| C  | -1.891981 | 3.132205  | 2.705169  |
| C  | -3.068590 | 1.160012  | 4.163104  |
| C  | -1.957991 | 3.269599  | 4.075679  |
| C  | -2.563761 | 2.270435  | 4.821035  |
| H  | -3.366730 | 0.247657  | 2.234535  |
| H  | -1.396543 | 3.877702  | 2.095533  |
| H  | -1.522894 | 4.148233  | 4.542989  |
| H  | -3.534450 | 0.341518  | 4.702761  |
| H  | -3.534450 | 0.341518  | -4.702761 |
| H  | 3.534450  | -0.341518 | 4.702761  |
| H  | 3.534450  | -0.341518 | -4.702761 |
| H  | -1.522894 | 4.148233  | -4.542989 |
| H  | 1.522894  | -4.148233 | 4.542989  |
| H  | 1.522894  | -4.148233 | -4.542989 |
| H  | -1.396543 | 3.877702  | -2.095533 |
| H  | 1.396543  | -3.877702 | 2.095533  |
| H  | 1.396543  | -3.877702 | -2.095533 |
| H  | -3.366730 | 0.247657  | -2.234535 |
| H  | 3.366730  | -0.247657 | 2.234535  |
| H  | 3.366730  | -0.247657 | -2.234535 |
| H  | -2.630649 | 2.350581  | -5.903048 |
| H  | 2.630649  | -2.350581 | 5.903048  |
| H  | 2.630649  | -2.350581 | -5.903048 |
| N  | -2.418197 | 2.074483  | -2.068244 |
| N  | 2.418197  | -2.074483 | 2.068244  |
| N  | 2.418197  | -2.074483 | -2.068244 |
| C  | -2.563761 | 2.270435  | -4.821035 |
| C  | 2.563761  | -2.270435 | 4.821035  |
| C  | 2.563761  | -2.270435 | -4.821035 |
| C  | -1.957991 | 3.269599  | -4.075679 |
| C  | 1.957991  | -3.269599 | 4.075679  |
| C  | 1.957991  | -3.269599 | -4.075679 |
| C  | -3.068590 | 1.160012  | -4.163104 |
| C  | 3.068590  | -1.160012 | 4.163104  |
| C  | 3.068590  | -1.160012 | -4.163104 |
| C  | -1.891981 | 3.132205  | -2.705169 |
| C  | 1.891981  | -3.132205 | 2.705169  |
| C  | 1.891981  | -3.132205 | -2.705169 |
| C  | -2.983143 | 1.096697  | -2.786489 |

|   |           |           |           |
|---|-----------|-----------|-----------|
| C | 2.983143  | -1.096697 | 2.786489  |
| C | 2.983143  | -1.096697 | -2.786489 |
| N | 0.000000  | 0.000000  | -2.062293 |
| C | -0.514501 | -1.026767 | -2.742421 |
| C | 0.514501  | 1.026767  | -2.742421 |
| C | -0.530786 | -1.068373 | -4.121678 |
| C | 0.530786  | 1.068373  | -4.121678 |
| C | 0.000000  | 0.000000  | -4.825352 |
| H | -0.917265 | -1.838346 | -2.146437 |
| H | 0.917265  | 1.838346  | -2.146437 |
| H | 0.959669  | 1.925617  | -4.631214 |
| H | 0.959669  | 1.925617  | 4.631214  |
| H | -0.959669 | -1.925617 | 4.631214  |
| H | 0.917265  | 1.838346  | 2.146437  |
| H | -0.917265 | -1.838346 | 2.146437  |
| H | 0.000000  | 0.000000  | 5.912635  |
| N | 0.000000  | 0.000000  | 2.062293  |
| C | 0.000000  | 0.000000  | 4.825352  |
| C | 0.530786  | 1.068373  | 4.121678  |
| C | -0.530786 | -1.068373 | 4.121678  |
| C | 0.514501  | 1.026767  | 2.742421  |
| C | -0.514501 | -1.026767 | 2.742421  |

Input files for ADF geometry optimization and frequencies calculations:

```

Atoms
INLINE geom.xyz
End

Geometry
Step TrustRadius=0.1
End

Charge 1

Basis
Type TZP
Core None
End

AnalyticalFreq
End

XC
GGA OPBE
Dispersion Grimme4
End

SOLVATION
Solv Name=Water
SCF VAR ALL
END

eor

```

Input files for ADF TD-DFT calculations:

Atoms  
INLINE geom.xyz  
End

Dependency  
End

EXACTDENSITY

charge 1

Basis  
Type TZP  
Core None  
END

XC  
model saop  
End

Excitations  
lowest 40  
NTO  
Allowed  
End

SOLVATION  
Solv Name=Water Neq=1.79  
SCF VAR ALL  
NOCSMRSP  
End

End input  
eor
